# Supplementary material for: Structure and evolution of the filaggrin gene repeated region in primates
Source: PubMed Central journal article supplement (PMC5225520; doi:10.1186/s12862-016-0851-5), 2017-01-11
Supplement: 12862_2016_851_MOESM1_ESM.pdf [file 12862_2016_851_MOESM1_ESM.pdf]

1 **Filaggrin-like gene evolution in chimpanzee and crab-eating macaque**

2 Our study focuses on the evolution of the repeated region of filaggrin under the birth-and-  
3 death model. The birth-and-death model suggests the presence of pseudogenes. In the NCBI  
4 gene database we did not find any filaggrin pseudogenes but there are two types of genes that  
5 are similar to the complete repeats from filaggrin; filaggrin-2 and filaggrin-like. Filaggrin-2  
6 repeats are shorter than complete filaggrin repeats (225bp) and we did not consider filaggrin-  
7 2 for further analysis. We found one filaggrin-like gene located in chromosome 1 of  
8 chimpanzee and two filaggrin-like genes located in chromosomes 1 and 3 of macaque. We  
9 compared these sequences with repeat of the corresponding species by a dot-matrix analysis  
10 using the Harrplot program (Supplementary Figure S2C, D and E, Supplementary Material  
11 Online). Filaggrin-like gene in chimpanzee includes 1 complete repeat between two  
12 incomplete repeats. Only one complete filaggrin repeat was found in the chimpanzee  
13 filaggrin-like sequence thus we could not perform any evolutionary analysis. Filaggrin-like  
14 gene in macaque located in chromosome 3 does not include any filaggrin repeats and the one  
15 located in chromosome 1 includes 5 complete repeats. In crab-eating macaque filaggrin-like  
16 and filaggrin have a similar total variation, average  $Ka/Ks$ , nucleotide variation; in addition no  
17 positively selected sites were detected (Supplementary Table S6, S7 and S8, Supplementary  
18 Material Online). We concluded that filaggrin and filaggrin-like repeats have been evolving  
19 under a similar birth-and-death model with strong selective constraints and none positively  
20 selected codons.

21  
22  
23  
24  
25  
26  
27  
28  
29

1 **Table S1.** Primer sets for the filaggrin gene repeat region in human, chimpanzee, gorilla,  
 2 orangutan, crab-eating macaque, and human variation in repeated region.

| <b>REPEATED REGION</b>                    |                                         |
|-------------------------------------------|-----------------------------------------|
| <b>Human</b>                              |                                         |
| <b>Forward</b>                            | 5' -CTTGTCATATGGCTAACTGGCTTTCAGAGA-3'   |
| <b>Reverse</b>                            | 5' -ATTGTGGGACAGTGATTATGTTGGAGAAAA-3'   |
| <b>Human variation in repeated region</b> |                                         |
| <b>Forward</b>                            | 5' -GTGCAAGCAGAAAAACATATGACA -3'        |
| <b>Reverse</b>                            | 5' -CCTGTTTCGTGATCTGCCTTTGACATGG -3'    |
| <b>Chimpanzee</b>                         |                                         |
| <b>Forward</b>                            | 5' -TGTTACATATAACACCTGAATGAGGATGAGAC-3' |
| <b>Reverse</b>                            | 5' -GGATAATAGAGAAAGATGTGCTAGCCCTG-3'    |
| <b>Gorilla</b>                            |                                         |
| <b>Forward</b>                            | 5' -GTAACACCTGAATGAGGATGAGACGAAA-3'     |
| <b>Reverse</b>                            | 5' -TAGCCCTGATGTTGATATAGCCACTTTG-3'     |
| <b>Orangutan</b>                          |                                         |
| <b>Forward</b>                            | 5' -AAGAAAAAGCGTCACTTACCCCATCAAA-3'     |
| <b>Reverse</b>                            | 5' -TTGACATGGCTTAATCACCCACCTAAGTT-3'    |
| <b>Crab-eating macaque</b>                |                                         |
| <b>Forward</b>                            | 5' -ACACCTGAGCGAGGATGAGATGAAAAAG-3'     |
| <b>Reverse</b>                            | 5' -TCTGGCCATGGGGAAGTATGTAATTTGG-3'     |

3  
 4  
 5  
 6  
 7  
 8  
 9  
 10  
 11  
 12  
 13  
 14























| Aminoacids #  | 301 | 302 | 303 | 304 | 305 | 306 | 307 | 308 | 309 | 310 | 311 | 312 | 313 | 314 | 315 | 316 | 317 | 318 | 319 | 320 | 321 | 322 | 323 | 324 | 325 |
|---------------|-----|-----|-----|-----|-----|-----|-----|-----|-----|-----|-----|-----|-----|-----|-----|-----|-----|-----|-----|-----|-----|-----|-----|-----|-----|
| HumanR1       | S   | V   | S   | G   | H   | G   | Q   | A   | G   | H   | H   | Q   | Q   | S   | H   | Q   | E   | S   | A   | R   | D   | R   | S   | G   | E   |
| HumanR2       | -   | -   | -   | -   | -   | -   | -   | D   | -   | P   | -   | -   | -   | -   | -   | -   | -   | -   | -   | -   | -   | -   | -   | -   | -   |
| HumanR3       | -   | -   | -   | A   | -   | -   | -   | -   | -   | P   | -   | -   | -   | -   | -   | K   | -   | -   | -   | -   | G   | Q   | -   | -   | G   |
| HumanR4       | -   | -   | -   | A   | -   | -   | -   | -   | -   | P   | -   | -   | -   | -   | -   | -   | -   | -   | T   | -   | G   | Q   | -   | -   | -   |
| HumanR5       | -   | -   | -   | A   | Q   | -   | K   | -   | -   | P   | -   | -   | -   | -   | -   | K   | -   | -   | -   | -   | G   | Q   | -   | -   | -   |
| HumanR6       | -   | -   | -   | A   | -   | -   | -   | -   | -   | P   | -   | -   | -   | -   | -   | -   | -   | -   | T   | -   | G   | Q   | -   | A   | G   |
| HumanR7       | -   | -   | -   | A   | -   | -   | -   | -   | -   | S   | -   | -   | -   | -   | -   | -   | -   | -   | -   | -   | G   | -   | -   | -   | -   |
| HumanR8       | -   | -   | -   | A   | -   | -   | -   | -   | -   | S   | -   | -   | -   | -   | -   | -   | -   | -   | -   | -   | G   | -   | -   | -   | -   |
| HumanR9       | -   | -   | -   | -   | -   | -   | -   | -   | -   | P   | -   | -   | -   | -   | -   | -   | -   | -   | -   | -   | -   | -   | -   | -   | G   |
| HumanR10      | -   | -   | -   | A   | -   | -   | -   | -   | -   | P   | -   | -   | -   | -   | -   | -   | -   | -   | T   | -   | G   | Q   | -   | A   | G   |
| ChimpanzeeR1  | -   | -   | -   | S   | -   | -   | -   | -   | -   | P   | -   | -   | -   | -   | -   | K   | -   | -   | -   | -   | G   | Q   | -   | -   | -   |
| ChimpanzeeR2  | -   | -   | -   | A   | -   | -   | -   | -   | -   | P   | R   | -   | -   | -   | -   | -   | -   | -   | T   | -   | G   | Q   | -   | -   | -   |
| ChimpanzeeR3  | -   | -   | -   | -   | -   | -   | -   | D   | -   | P   | -   | -   | -   | -   | -   | -   | -   | -   | -   | -   | -   | -   | -   | -   | G   |
| ChimpanzeeR4  | -   | -   | -   | S   | -   | -   | -   | -   | -   | P   | -   | -   | -   | -   | -   | K   | -   | -   | -   | -   | G   | Q   | -   | -   | -   |
| ChimpanzeeR5  | -   | -   | -   | A   | -   | -   | -   | -   | -   | P   | R   | -   | -   | -   | -   | -   | -   | -   | T   | -   | G   | Q   | -   | -   | -   |
| ChimpanzeeR6  | L   | -   | -   | A   | -   | -   | -   | -   | -   | P   | -   | -   | -   | -   | -   | -   | -   | -   | T   | -   | G   | Q   | -   | A   | -   |
| ChimpanzeeR7  | -   | -   | -   | A   | -   | -   | -   | -   | -   | S   | -   | -   | -   | -   | -   | -   | -   | -   | -   | -   | G   | -   | -   | -   | -   |
| ChimpanzeeR8  | -   | -   | -   | -   | -   | -   | -   | D   | -   | P   | -   | -   | -   | -   | -   | -   | -   | -   | -   | -   | -   | -   | -   | -   | G   |
| ChimpanzeeR9  | -   | -   | -   | A   | Q   | -   | -   | -   | -   | P   | -   | -   | R   | -   | -   | K   | -   | -   | -   | -   | G   | Q   | -   | -   | -   |
| ChimpanzeeR10 | -   | -   | -   | A   | -   | -   | -   | -   | -   | P   | -   | -   | -   | -   | -   | -   | -   | -   | T   | -   | G   | -   | -   | A   | -   |
| GorillaR1     | -   | -   | -   | A   | -   | -   | -   | -   | -   | P   | R   | -   | -   | -   | -   | -   | -   | -   | P   | H   | G   | -   | -   | -   | -   |
| GorillaR2     | -   | -   | -   | A   | -   | -   | -   | -   | -   | P   | R   | -   | -   | -   | -   | -   | -   | -   | T   | -   | A   | Q   | -   | -   | -   |
| GorillaR3     | -   | -   | -   | -   | -   | -   | -   | -   | -   | P   | -   | -   | -   | -   | -   | -   | -   | -   | T   | -   | -   | -   | -   | -   | G   |
| GorillaR4     | -   | -   | -   | A   | -   | -   | -   | -   | -   | P   | R   | -   | -   | -   | -   | -   | -   | -   | T   | -   | A   | Q   | -   | -   | -   |
| GorillaR5     | -   | -   | -   | -   | -   | -   | -   | -   | -   | -   | -   | -   | -   | -   | -   | -   | -   | -   | T   | -   | -   | -   | -   | -   | G   |
| GorillaR6     | -   | -   | -   | A   | -   | -   | -   | -   | -   | P   | R   | -   | -   | -   | -   | -   | -   | -   | T   | -   | A   | Q   | -   | -   | -   |
| GorillaR7     | -   | -   | -   | -   | -   | -   | -   | -   | -   | -   | -   | -   | -   | -   | -   | -   | -   | -   | T   | -   | -   | -   | -   | -   | G   |
| GorillaR8     | -   | -   | -   | A   | -   | -   | -   | -   | -   | P   | R   | -   | -   | -   | -   | -   | -   | -   | T   | -   | A   | Q   | -   | R   | -   |
| GorillaR9     | -   | -   | -   | A   | -   | -   | -   | -   | -   | P   | R   | -   | -   | -   | -   | -   | -   | -   | T   | -   | G   | Q   | -   | A   | -   |
| GorillaR10    | -   | -   | -   | A   | -   | -   | -   | -   | -   | P   | -   | -   | -   | -   | -   | -   | -   | -   | T   | -   | G   | Q   | -   | A   | -   |
| OrangutanR1   | -   | -   | -   | P   | -   | -   | -   | -   | -   | A   | -   | R   | -   | -   | -   | -   | -   | -   | -   | -   | H   | G   | -   | -   | -   |
| OrangutanR2   | -   | -   | -   | A   | -   | -   | -   | P   | R   | P   | -   | -   | -   | -   | -   | -   | -   | -   | -   | -   | G   | Q   | -   | -   | -   |
| OrangutanR3   | -   | -   | -   | A   | -   | -   | -   | -   | -   | P   | -   | -   | -   | -   | -   | K   | -   | -   | -   | -   | H   | G   | -   | -   | -   |
| OrangutanR4   | -   | -   | -   | A   | -   | -   | -   | -   | -   | P   | -   | -   | -   | -   | -   | K   | -   | -   | -   | -   | H   | G   | -   | -   | -   |
| OrangutanR5   | -   | -   | -   | A   | -   | -   | -   | -   | -   | P   | -   | -   | R   | -   | -   | -   | -   | -   | -   | -   | G   | W   | -   | -   | -   |
| OrangutanR6   | -   | -   | -   | A   | -   | -   | -   | D   | -   | P   | -   | -   | -   | -   | -   | -   | -   | -   | -   | -   | H   | G   | W   | -   | -   |
| OrangutanR7   | -   | -   | -   | A   | -   | -   | -   | -   | -   | P   | -   | -   | -   | -   | -   | -   | -   | -   | -   | -   | G   | Q   | -   | -   | -   |
| OrangutanR8   | -   | -   | -   | P   | -   | -   | -   | P   | R   | P   | -   | -   | -   | -   | -   | -   | -   | -   | -   | -   | G   | Q   | -   | -   | -   |
| OrangutanR9   | -   | -   | -   | A   | -   | E   | -   | -   | -   | P   | -   | -   | -   | -   | -   | -   | -   | -   | -   | -   | G   | -   | -   | -   | -   |
| MacaqueR12    | -   | -   | -   | -   | -   | -   | -   | -   | -   | P   | P   | H   | -   | -   | -   | -   | -   | -   | -   | -   | -   | G   | -   | -   | -   |
| MacaqueR1     | -   | -   | -   | -   | -   | -   | -   | -   | -   | P   | P   | H   | -   | -   | -   | -   | -   | -   | -   | -   | -   | G   | -   | -   | -   |
| MacaqueR2     | -   | -   | -   | Q   | -   | -   | -   | -   | -   | R   | P   | H   | -   | -   | -   | -   | -   | -   | -   | -   | G   | -   | -   | -   | -   |
| MacaqueR3     | -   | -   | -   | -   | -   | -   | -   | -   | -   | P   | P   | H   | -   | -   | -   | -   | -   | -   | -   | -   | -   | G   | -   | -   | -   |
| MacaqueR4     | -   | -   | -   | Q   | -   | -   | -   | -   | -   | R   | P   | H   | -   | -   | -   | -   | -   | -   | -   | -   | -   | G   | -   | -   | -   |
| MacaqueR5     | -   | -   | -   | -   | -   | -   | -   | -   | -   | P   | P   | H   | -   | -   | -   | -   | -   | -   | -   | -   | -   | G   | -   | -   | -   |
| MacaqueR6     | -   | -   | -   | -   | -   | -   | -   | -   | -   | R   | P   | H   | -   | -   | -   | -   | -   | -   | -   | -   | -   | G   | -   | -   | -   |
| MacaqueR7     | -   | -   | -   | Q   | -   | -   | -   | -   | -   | P   | P   | H   | -   | -   | -   | -   | -   | -   | -   | -   | -   | G   | -   | -   | -   |
| MacaqueR8     | -   | -   | -   | Q   | -   | -   | -   | -   | -   | R   | P   | H   | -   | -   | -   | -   | -   | -   | -   | -   | -   | G   | -   | -   | -   |
| MacaqueR9     | -   | -   | -   | -   | -   | -   | -   | -   | -   | P   | P   | H   | -   | -   | -   | -   | -   | -   | -   | -   | -   | G   | -   | -   | -   |
| MacaqueR10    | -   | -   | -   | Q   | -   | -   | -   | -   | -   | R   | P   | H   | -   | -   | -   | -   | -   | -   | -   | -   | -   | G   | -   | -   | -   |
| MacaqueR11    | -   | -   | -   | -   | -   | -   | -   | -   | -   | P   | P   | H   | -   | -   | -   | -   | -   | -   | -   | -   | -   | G   | -   | -   | -   |

- 1
- 2
- 3
- 4
- 5
- 6
- 7
- 8
- 9
- 10
- 11
- 12
- 13
- 14
- 15
- 16
- 17
- 18
- 19
- 20
- 21
- 22
- 23
- 24

1 **Table S3.** DNA/Protein Model comparison between 25 models including the number of  
 2 parameters, AICc and lnL

| <b>Model</b> | <b>#Parameters</b> | <b>AICc</b> | <b>lnL</b> |
|--------------|--------------------|-------------|------------|
| TN93+G+I     | 106                | 15792.76    | -7790.15   |
| TN93+G       | 105                | 15797.00    | -7793.28   |
| GTR+G+I      | 109                | 15797.15    | -7789.33   |
| GTR+G        | 108                | 15801.25    | -7792.39   |
| HKY+G+I      | 105                | 15803.62    | -7796.58   |
| HKY+G        | 104                | 15807.12    | -7799.34   |
| T92+G+I      | 103                | 15854.64    | -7824.10   |
| T92+G        | 102                | 15858.75    | -7827.16   |
| K2+G+I       | 102                | 15872.82    | -7834.20   |
| K2+G         | 101                | 15875.50    | -7836.54   |
| TN93+I       | 105                | 16001.73    | -7895.64   |
| GTR+I        | 108                | 16004.65    | -7894.09   |
| HKY+I        | 104                | 16011.18    | -7901.37   |
| T92+I        | 102                | 16062.56    | -7929.07   |
| K2+I         | 101                | 16073.61    | -7935.60   |
| JC+G+I       | 101                | 16259.30    | -8028.44   |
| JC+G         | 100                | 16261.94    | -8030.77   |
| JC+I         | 100                | 16455.10    | -8127.35   |
| GTR          | 107                | 16547.98    | -8166.76   |
| TN93         | 104                | 16561.66    | -8176.61   |
| HKY          | 103                | 16574.90    | -8184.23   |
| K2           | 100                | 16609.66    | -8204.63   |
| T92          | 101                | 16645.80    | -8221.69   |
| JC           | 99                 | 16984.97    | -8393.28   |

3  
 4  
 5  
 6  
 7  
 8  
 9  
 10  
 11

1 **Table S4.** The  $Ka/Ks$  ratio and  $(1 - Ka/Ks) \times 100$  for pairs of repeats of the filaggrin gene  
 2 within five primate species.

| <b>Human</b>    |                 |                          |                          |                             |                                              |
|-----------------|-----------------|--------------------------|--------------------------|-----------------------------|----------------------------------------------|
| <b>Repeat 1</b> | <b>Repeat 2</b> | <b><math>Ks^a</math></b> | <b><math>Ka^b</math></b> | <b><math>Ka/Ks^c</math></b> | <b><math>(1 - Ka/Ks) \times 100^d</math></b> |
| <b>HumanR10</b> | <b>HumanR3</b>  | <b>0.068</b>             | <b>0.071</b>             | <b>1.049</b>                |                                              |
| <b>HumanR3</b>  | <b>HumanR7</b>  | <b>0.071</b>             | <b>0.074</b>             | <b>1.047</b>                |                                              |
| HumanR7         | HumanR8         | 0.054                    | 0.053                    | 0.978                       | 2.2                                          |
| HumanR3         | HumanR8         | 0.101                    | 0.089                    | 0.877                       | 12.3                                         |
| HumanR2         | HumanR3         | 0.104                    | 0.090                    | 0.862                       | 13.8                                         |
| HumanR2         | HumanR8         | 0.066                    | 0.057                    | 0.856                       | 14.4                                         |
| HumanR3         | HumanR9         | 0.124                    | 0.105                    | 0.846                       | 15.4                                         |
| HumanR7         | HumanR9         | 0.110                    | 0.091                    | 0.825                       | 17.5                                         |
| HumanR3         | HumanR5         | 0.080                    | 0.064                    | 0.800                       | 20                                           |
| HumanR1         | HumanR3         | 0.090                    | 0.071                    | 0.794                       | 20.6                                         |
| HumanR4         | HumanR7         | 0.124                    | 0.097                    | 0.783                       | 21.7                                         |
| HumanR2         | HumanR7         | 0.103                    | 0.080                    | 0.775                       | 22.5                                         |
| HumanR4         | HumanR8         | 0.119                    | 0.091                    | 0.765                       | 23.5                                         |
| HumanR2         | HumanR5         | 0.110                    | 0.083                    | 0.762                       | 23.8                                         |
| HumanR6         | HumanR7         | 0.095                    | 0.071                    | 0.755                       | 24.5                                         |
| HumanR2         | HumanR9         | 0.050                    | 0.037                    | 0.754                       | 24.6                                         |
| HumanR6         | HumanR8         | 0.098                    | 0.073                    | 0.746                       | 25.4                                         |
| HumanR10        | HumanR8         | 0.090                    | 0.065                    | 0.727                       | 27.3                                         |
| HumanR5         | HumanR7         | 0.078                    | 0.056                    | 0.723                       | 27.7                                         |
| HumanR6         | HumanR9         | 0.121                    | 0.086                    | 0.712                       | 28.8                                         |
| HumanR1         | HumanR8         | 0.100                    | 0.068                    | 0.686                       | 31.4                                         |
| HumanR2         | HumanR6         | 0.113                    | 0.078                    | 0.685                       | 31.5                                         |
| HumanR10        | HumanR7         | 0.075                    | 0.051                    | 0.685                       | 31.5                                         |
| HumanR8         | HumanR9         | 0.052                    | 0.035                    | 0.680                       | 32                                           |
| HumanR10        | HumanR9         | 0.112                    | 0.075                    | 0.669                       | 33.1                                         |
| HumanR10        | HumanR4         | 0.136                    | 0.091                    | 0.667                       | 33.3                                         |
| HumanR1         | HumanR2         | 0.110                    | 0.073                    | 0.663                       | 33.7                                         |
| HumanR5         | HumanR9         | 0.135                    | 0.088                    | 0.653                       | 34.7                                         |
| HumanR3         | HumanR4         | 0.150                    | 0.096                    | 0.636                       | 36.4                                         |
| HumanR1         | HumanR9         | 0.133                    | 0.084                    | 0.635                       | 36.5                                         |

|                      |                     |                       |                       |                          |                                      |
|----------------------|---------------------|-----------------------|-----------------------|--------------------------|--------------------------------------|
| HumanR1              | HumanR4             | 0.150                 | 0.094                 | 0.630                    | 37                                   |
| HumanR4              | HumanR6             | 0.136                 | 0.086                 | 0.630                    | 37                                   |
| HumanR2              | HumanR4             | 0.140                 | 0.088                 | 0.629                    | 37.1                                 |
| HumanR4              | HumanR9             | 0.153                 | 0.095                 | 0.622                    | 37.8                                 |
| HumanR3              | HumanR6             | 0.140                 | 0.085                 | 0.604                    | 39.6                                 |
| HumanR4              | HumanR5             | 0.162                 | 0.097                 | 0.595                    | 40.5                                 |
| HumanR10             | HumanR2             | 0.108                 | 0.063                 | 0.588                    | 41.2                                 |
| HumanR5              | HumanR6             | 0.127                 | 0.074                 | 0.583                    | 41.7                                 |
| HumanR5              | HumanR8             | 0.117                 | 0.068                 | 0.579                    | 42.1                                 |
| HumanR1              | HumanR7             | 0.087                 | 0.050                 | 0.574                    | 42.6                                 |
| HumanR10             | HumanR5             | 0.103                 | 0.057                 | 0.551                    | 44.9                                 |
| HumanR10             | HumanR6             | 0.096                 | 0.051                 | 0.525                    | 47.5                                 |
| HumanR1              | HumanR10            | 0.104                 | 0.050                 | 0.480                    | 52                                   |
| HumanR1              | HumanR6             | 0.143                 | 0.068                 | 0.471                    | 52.9                                 |
| HumanR1              | HumanR5             | 0.122                 | 0.049                 | 0.401                    | 59.9                                 |
| <b>Chimpanzee</b>    |                     |                       |                       |                          |                                      |
| <b>Repeat 1</b>      | <b>Repeat 2</b>     | <b>Ks<sup>a</sup></b> | <b>Ka<sup>b</sup></b> | <b>Ka/Ks<sup>c</sup></b> | <b>(1 - Ka/Ks) × 100<sup>d</sup></b> |
| <b>ChimpanzeeR3</b>  | <b>ChimpanzeeR6</b> | <b>0.004</b>          | <b>0.018</b>          | <b>4.023</b>             |                                      |
| <b>ChimpanzeeR10</b> | <b>ChimpanzeeR3</b> | <b>0.079</b>          | <b>0.079</b>          | <b>1.010</b>             |                                      |
| ChimpanzeeR10        | ChimpanzeeR8        | 0.070                 | 0.066                 | 0.937                    | 6.3                                  |
| ChimpanzeeR10        | ChimpanzeeR2        | 0.115                 | 0.091                 | 0.792                    | 20.8                                 |
| ChimpanzeeR10        | ChimpanzeeR5        | 0.115                 | 0.091                 | 0.792                    | 20.8                                 |
| ChimpanzeeR6         | ChimpanzeeR8        | 0.100                 | 0.076                 | 0.758                    | 24.2                                 |
| ChimpanzeeR10        | ChimpanzeeR6        | 0.083                 | 0.063                 | 0.758                    | 24.2                                 |
| ChimpanzeeR2         | ChimpanzeeR7        | 0.145                 | 0.107                 | 0.736                    | 26.4                                 |
| ChimpanzeeR5         | ChimpanzeeR7        | 0.145                 | 0.107                 | 0.736                    | 26.4                                 |
| ChimpanzeeR10        | ChimpanzeeR9        | 0.098                 | 0.071                 | 0.722                    | 27.8                                 |
| ChimpanzeeR2         | ChimpanzeeR8        | 0.148                 | 0.103                 | 0.695                    | 30.5                                 |
| ChimpanzeeR5         | ChimpanzeeR8        | 0.148                 | 0.103                 | 0.695                    | 30.5                                 |
| ChimpanzeeR3         | ChimpanzeeR8        | 0.095                 | 0.065                 | 0.686                    | 31.4                                 |
| ChimpanzeeR2         | ChimpanzeeR3        | 0.148                 | 0.099                 | 0.673                    | 32.7                                 |
| ChimpanzeeR3         | ChimpanzeeR5        | 0.148                 | 0.099                 | 0.673                    | 32.7                                 |
| ChimpanzeeR2         | ChimpanzeeR6        | 0.137                 | 0.092                 | 0.670                    | 33                                   |



|                  |                  |                       |                       |                          |                                      |
|------------------|------------------|-----------------------|-----------------------|--------------------------|--------------------------------------|
| ChimpanzeeR5     | ChimpanzeeR6     | 0.137                 | 0.092                 | 0.670                    | 33                                   |
| ChimpanzeeR2     | ChimpanzeeR9     | 0.136                 | 0.091                 | 0.669                    | 33.1                                 |
| ChimpanzeeR5     | ChimpanzeeR9     | 0.136                 | 0.091                 | 0.669                    | 33.1                                 |
| ChimpanzeeR3     | ChimpanzeeR7     | 0.093                 | 0.062                 | 0.666                    | 33.4                                 |
| ChimpanzeeR4     | ChimpanzeeR7     | 0.082                 | 0.053                 | 0.649                    | 35.1                                 |
| ChimpanzeeR3     | ChimpanzeeR9     | 0.092                 | 0.059                 | 0.646                    | 35.4                                 |
| ChimpanzeeR8     | ChimpanzeeR9     | 0.115                 | 0.071                 | 0.622                    | 37.8                                 |
| ChimpanzeeR2     | ChimpanzeeR4     | 0.146                 | 0.089                 | 0.608                    | 39.2                                 |
| ChimpanzeeR4     | ChimpanzeeR5     | 0.146                 | 0.089                 | 0.608                    | 39.2                                 |
| ChimpanzeeR4     | ChimpanzeeR9     | 0.073                 | 0.044                 | 0.607                    | 39.3                                 |
| ChimpanzeeR6     | ChimpanzeeR7     | 0.088                 | 0.052                 | 0.590                    | 41                                   |
| ChimpanzeeR10    | ChimpanzeeR7     | 0.113                 | 0.066                 | 0.584                    | 41.6                                 |
| ChimpanzeeR7     | ChimpanzeeR9     | 0.101                 | 0.058                 | 0.571                    | 42.9                                 |
| ChimpanzeeR3     | ChimpanzeeR4     | 0.107                 | 0.060                 | 0.566                    | 43.4                                 |
| ChimpanzeeR1     | ChimpanzeeR2     | 0.163                 | 0.089                 | 0.544                    | 45.6                                 |
| ChimpanzeeR1     | ChimpanzeeR5     | 0.163                 | 0.089                 | 0.544                    | 45.6                                 |
| ChimpanzeeR10    | ChimpanzeeR4     | 0.112                 | 0.060                 | 0.537                    | 46.3                                 |
| ChimpanzeeR6     | ChimpanzeeR9     | 0.091                 | 0.049                 | 0.537                    | 46.3                                 |
| ChimpanzeeR7     | ChimpanzeeR8     | 0.146                 | 0.076                 | 0.519                    | 48.1                                 |
| ChimpanzeeR4     | ChimpanzeeR8     | 0.140                 | 0.072                 | 0.511                    | 48.9                                 |
| ChimpanzeeR4     | ChimpanzeeR6     | 0.102                 | 0.050                 | 0.495                    | 50.5                                 |
| ChimpanzeeR10    | ChimpanzeeR1     | 0.134                 | 0.066                 | 0.495                    | 50.5                                 |
| ChimpanzeeR1     | ChimpanzeeR8     | 0.143                 | 0.069                 | 0.482                    | 51.8                                 |
| ChimpanzeeR1     | ChimpanzeeR9     | 0.091                 | 0.040                 | 0.443                    | 55.7                                 |
| ChimpanzeeR1     | ChimpanzeeR7     | 0.112                 | 0.047                 | 0.422                    | 57.8                                 |
| ChimpanzeeR1     | ChimpanzeeR3     | 0.133                 | 0.055                 | 0.410                    | 59                                   |
| ChimpanzeeR1     | ChimpanzeeR6     | 0.128                 | 0.044                 | 0.348                    | 65.2                                 |
| ChimpanzeeR1     | ChimpanzeeR4     | 0.068                 | 0.022                 | 0.324                    | 67.6                                 |
| ChimpanzeeR2     | ChimpanzeeR5     | 0.000                 | 0.000                 |                          |                                      |
| <b>Gorilla</b>   |                  |                       |                       |                          |                                      |
| <b>Repeat 1</b>  | <b>Repeat 2</b>  | <b>Ks<sup>a</sup></b> | <b>Ka<sup>b</sup></b> | <b>Ka/Ks<sup>c</sup></b> | <b>(1 - Ka/Ks) × 100<sup>d</sup></b> |
| <b>GorillaR2</b> | <b>GorillaR8</b> | 0.009                 | 0.022                 | 2.477                    |                                      |
| <b>GorillaR2</b> | <b>GorillaR9</b> | 0.063                 | 0.071                 | 1.117                    |                                      |
| <b>GorillaR8</b> | <b>GorillaR9</b> | 0.073                 | 0.080                 | 1.098                    |                                      |

|                  |                  |       |       |       |      |
|------------------|------------------|-------|-------|-------|------|
| <b>GorillaR7</b> | <b>GorillaR8</b> | 0.090 | 0.097 | 1.075 |      |
| <b>GorillaR3</b> | <b>GorillaR8</b> | 0.090 | 0.096 | 1.062 |      |
| <b>GorillaR1</b> | <b>GorillaR8</b> | 0.088 | 0.093 | 1.057 |      |
| <b>GorillaR5</b> | <b>GorillaR8</b> | 0.095 | 0.096 | 1.007 |      |
| <b>GorillaR2</b> | <b>GorillaR7</b> | 0.090 | 0.091 | 1.003 |      |
| GorillaR2        | GorillaR3        | 0.090 | 0.089 | 0.991 | 0.9  |
| GorillaR4        | GorillaR6        | 0.004 | 0.004 | 0.953 | 4.7  |
| GorillaR1        | GorillaR2        | 0.086 | 0.082 | 0.951 | 4.9  |
| GorillaR2        | GorillaR5        | 0.095 | 0.089 | 0.940 | 6    |
| GorillaR4        | GorillaR8        | 0.085 | 0.070 | 0.826 | 17.4 |
| GorillaR6        | GorillaR7        | 0.084 | 0.069 | 0.822 | 17.8 |
| GorillaR6        | GorillaR8        | 0.087 | 0.071 | 0.811 | 18.9 |
| GorillaR4        | GorillaR7        | 0.081 | 0.065 | 0.802 | 19.8 |
| GorillaR3        | GorillaR9        | 0.051 | 0.041 | 0.801 | 19.9 |
| GorillaR1        | GorillaR7        | 0.082 | 0.065 | 0.791 | 20.9 |
| GorillaR3        | GorillaR4        | 0.083 | 0.066 | 0.790 | 21   |
| GorillaR3        | GorillaR6        | 0.086 | 0.067 | 0.775 | 22.5 |
| GorillaR7        | GorillaR9        | 0.061 | 0.045 | 0.748 | 25.2 |
| GorillaR4        | GorillaR5        | 0.088 | 0.066 | 0.747 | 25.3 |
| GorillaR1        | GorillaR3        | 0.084 | 0.063 | 0.746 | 25.4 |
| GorillaR2        | GorillaR4        | 0.083 | 0.062 | 0.739 | 26.1 |
| GorillaR2        | GorillaR6        | 0.085 | 0.063 | 0.735 | 26.5 |
| GorillaR5        | GorillaR9        | 0.056 | 0.041 | 0.735 | 26.5 |
| GorillaR5        | GorillaR6        | 0.091 | 0.067 | 0.734 | 26.6 |
| GorillaR1        | GorillaR8        | 0.128 | 0.092 | 0.717 | 28.3 |
| GorillaR1        | GorillaR5        | 0.089 | 0.063 | 0.705 | 29.5 |
| GorillaR1        | GorillaR2        | 0.115 | 0.080 | 0.696 | 30.4 |
| GorillaR1        | GorillaR9        | 0.086 | 0.059 | 0.686 | 31.4 |
| GorillaR4        | GorillaR9        | 0.100 | 0.067 | 0.667 | 33.3 |
| GorillaR6        | GorillaR9        | 0.103 | 0.068 | 0.659 | 34.1 |
| GorillaR1        | GorillaR7        | 0.109 | 0.066 | 0.604 | 39.6 |
| GorillaR1        | GorillaR3        | 0.101 | 0.061 | 0.602 | 39.8 |
| GorillaR1        | GorillaR4        | 0.078 | 0.045 | 0.574 | 42.6 |
| GorillaR1        | GorillaR5        | 0.106 | 0.061 | 0.573 | 42.7 |
| GorillaR1        | GorillaR9        | 0.103 | 0.059 | 0.569 | 43.1 |
| GorillaR1        | GorillaR6        | 0.082 | 0.046 | 0.557 | 44.3 |

|                  |                 |                              |                              |                                 |                                             |
|------------------|-----------------|------------------------------|------------------------------|---------------------------------|---------------------------------------------|
| GorillaR1        | GorillaR6       | 0.072                        | 0.036                        | 0.497                           | 50.3                                        |
| GorillaR3        | GorillaR7       | 0.009                        | 0.004                        | 0.471                           | 52.9                                        |
| GorillaR1        | GorillaR1       | 0.085                        | 0.039                        | 0.462                           | 53.8                                        |
| GorillaR1        | GorillaR4       | 0.077                        | 0.035                        | 0.449                           | 55.1                                        |
| GorillaR5        | GorillaR7       | 0.013                        | 0.004                        | 0.313                           | 68.7                                        |
| GorillaR3        | GorillaR5       | 0.004                        | 0.000                        | 0.000                           |                                             |
| <b>Orangutan</b> |                 |                              |                              |                                 |                                             |
| <b>Repeat 1</b>  | <b>Repeat 2</b> | <b><i>Ks</i><sup>a</sup></b> | <b><i>Ka</i><sup>b</sup></b> | <b><i>Ka/Ks</i><sup>c</sup></b> | <b>(1 - <i>Ka/Ks</i>) × 100<sup>d</sup></b> |
| OrangutanR2      | OrangutanR7     | 0.085                        | 0.080                        | 0.943                           | 5.7                                         |
| OrangutanR4      | OrangutanR7     | 0.052                        | 0.047                        | 0.909                           | 9.1                                         |
| OrangutanR5      | OrangutanR7     | 0.054                        | 0.046                        | 0.855                           | 14.5                                        |
| OrangutanR2      | OrangutanR3     | 0.097                        | 0.079                        | 0.815                           | 18.5                                        |
| OrangutanR1      | OrangutanR2     | 0.148                        | 0.117                        | 0.788                           | 21.2                                        |
| OrangutanR2      | OrangutanR6     | 0.102                        | 0.081                        | 0.788                           | 21.2                                        |
| OrangutanR7      | OrangutanR9     | 0.073                        | 0.055                        | 0.763                           | 23.7                                        |
| OrangutanR6      | OrangutanR7     | 0.078                        | 0.060                        | 0.759                           | 24.1                                        |
| OrangutanR2      | OrangutanR5     | 0.100                        | 0.075                        | 0.758                           | 24.2                                        |
| OrangutanR5      | OrangutanR6     | 0.106                        | 0.080                        | 0.754                           | 24.6                                        |
| OrangutanR4      | OrangutanR9     | 0.086                        | 0.065                        | 0.753                           | 24.7                                        |
| OrangutanR4      | OrangutanR6     | 0.093                        | 0.070                        | 0.752                           | 24.8                                        |
| OrangutanR6      | OrangutanR8     | 0.119                        | 0.086                        | 0.729                           | 27.1                                        |
| OrangutanR3      | OrangutanR8     | 0.101                        | 0.071                        | 0.702                           | 29.8                                        |
| OrangutanR1      | OrangutanR5     | 0.140                        | 0.097                        | 0.695                           | 30.5                                        |
| OrangutanR5      | OrangutanR9     | 0.104                        | 0.070                        | 0.674                           | 32.6                                        |
| OrangutanR4      | OrangutanR5     | 0.043                        | 0.029                        | 0.671                           | 32.9                                        |
| OrangutanR3      | OrangutanR5     | 0.110                        | 0.074                        | 0.668                           | 33.2                                        |
| OrangutanR2      | OrangutanR4     | 0.107                        | 0.070                        | 0.659                           | 34.1                                        |
| OrangutanR2      | OrangutanR8     | 0.115                        | 0.075                        | 0.657                           | 34.3                                        |
| OrangutanR8      | OrangutanR9     | 0.128                        | 0.082                        | 0.641                           | 35.9                                        |
| OrangutanR6      | OrangutanR9     | 0.095                        | 0.060                        | 0.635                           | 36.5                                        |
| OrangutanR3      | OrangutanR9     | 0.096                        | 0.059                        | 0.610                           | 39                                          |
| OrangutanR3      | OrangutanR7     | 0.100                        | 0.060                        | 0.601                           | 39.9                                        |
| OrangutanR1      | OrangutanR6     | 0.162                        | 0.097                        | 0.599                           | 40.1                                        |
| OrangutanR1      | OrangutanR4     | 0.147                        | 0.087                        | 0.592                           | 40.8                                        |

|             |             |       |       |       |      |
|-------------|-------------|-------|-------|-------|------|
| OrangutanR2 | OrangutanR9 | 0.120 | 0.071 | 0.587 | 41.3 |
| OrangutanR3 | OrangutanR4 | 0.103 | 0.060 | 0.581 | 41.9 |
| OrangutanR7 | OrangutanR8 | 0.108 | 0.063 | 0.579 | 42.1 |
| OrangutanR1 | OrangutanR7 | 0.159 | 0.090 | 0.569 | 43.1 |
| OrangutanR5 | OrangutanR8 | 0.121 | 0.066 | 0.549 | 45.1 |
| OrangutanR3 | OrangutanR6 | 0.093 | 0.049 | 0.528 | 47.2 |
| OrangutanR1 | OrangutanR9 | 0.192 | 0.101 | 0.526 | 47.4 |
| OrangutanR4 | OrangutanR8 | 0.113 | 0.054 | 0.476 | 52.4 |
| OrangutanR1 | OrangutanR3 | 0.198 | 0.089 | 0.448 | 55.2 |
| OrangutanR1 | OrangutanR8 | 0.198 | 0.087 | 0.440 | 56   |

---

**Crab-eating macaque**

---

| <b>Repeat 1</b>       | <b>Repeat 2</b>       | <b><i>Ks</i><sup>a</sup></b> | <b><i>Ka</i><sup>b</sup></b> | <b><i>Ka/Ks</i><sup>c</sup></b> | <b>(1 - <i>Ka/Ks</i>)<sup>d</sup><br/>× 100<sup>d</sup></b> |
|-----------------------|-----------------------|------------------------------|------------------------------|---------------------------------|-------------------------------------------------------------|
| Crab-eating macaqueR1 | Crab-eating macaqueR1 | 0.049                        | 0.026                        | 0.530                           | 47                                                          |
| Crab-eating macaqueR1 | Crab-eating macaqueR4 | 0.049                        | 0.026                        | 0.530                           | 47                                                          |
| Crab-eating macaqueR1 | Crab-eating macaqueR6 | 0.049                        | 0.026                        | 0.530                           | 47                                                          |
| Crab-eating macaqueR1 | Crab-eating macaqueR8 | 0.049                        | 0.026                        | 0.530                           | 47                                                          |
| Crab-eating macaqueR1 | Crab-eating macaqueR1 | 0.035                        | 0.015                        | 0.441                           | 55.9                                                        |
| Crab-eating macaqueR1 | Crab-eating macaqueR1 | 0.086                        | 0.033                        | 0.388                           | 61.2                                                        |
| Crab-eating macaqueR1 | Crab-eating macaqueR4 | 0.086                        | 0.033                        | 0.388                           | 61.2                                                        |
| Crab-eating macaqueR1 | Crab-eating macaqueR6 | 0.086                        | 0.033                        | 0.388                           | 61.2                                                        |
| Crab-eating macaqueR1 | Crab-eating macaqueR8 | 0.086                        | 0.033                        | 0.388                           | 61.2                                                        |
| Crab-eating macaqueR1 | Crab-eating macaqueR2 | 0.087                        | 0.029                        | 0.332                           | 66.8                                                        |
| Crab-eating macaqueR1 | Crab-eating macaqueR1 | 0.071                        | 0.021                        | 0.291                           | 70.9                                                        |

|                          |                          |       |       |       |      |
|--------------------------|--------------------------|-------|-------|-------|------|
| Crab-eating<br>macaqueR1 | Crab-eating<br>macaqueR3 | 0.071 | 0.021 | 0.291 | 70.9 |
| Crab-eating<br>macaqueR1 | Crab-eating<br>macaqueR5 | 0.071 | 0.021 | 0.291 | 70.9 |
| Crab-eating<br>macaqueR1 | Crab-eating<br>macaqueR7 | 0.071 | 0.021 | 0.291 | 70.9 |
| Crab-eating<br>macaqueR1 | Crab-eating<br>macaqueR9 | 0.071 | 0.021 | 0.291 | 70.9 |
| Crab-eating<br>macaqueR1 | Crab-eating<br>macaqueR1 | 0.126 | 0.036 | 0.288 | 71.2 |
| Crab-eating<br>macaqueR1 | Crab-eating<br>macaqueR3 | 0.126 | 0.036 | 0.288 | 71.2 |
| Crab-eating<br>macaqueR1 | Crab-eating<br>macaqueR5 | 0.126 | 0.036 | 0.288 | 71.2 |
| Crab-eating<br>macaqueR1 | Crab-eating<br>macaqueR7 | 0.126 | 0.036 | 0.288 | 71.2 |
| Crab-eating<br>macaqueR1 | Crab-eating<br>macaqueR9 | 0.126 | 0.036 | 0.288 | 71.2 |
| Crab-eating<br>macaqueR1 | Crab-eating<br>macaqueR4 | 0.126 | 0.036 | 0.288 | 71.2 |
| Crab-eating<br>macaqueR1 | Crab-eating<br>macaqueR6 | 0.126 | 0.036 | 0.288 | 71.2 |
| Crab-eating<br>macaqueR1 | Crab-eating<br>macaqueR8 | 0.126 | 0.036 | 0.288 | 71.2 |
| Crab-eating<br>macaqueR3 | Crab-eating<br>macaqueR4 | 0.126 | 0.036 | 0.288 | 71.2 |
| Crab-eating<br>macaqueR3 | Crab-eating<br>macaqueR6 | 0.126 | 0.036 | 0.288 | 71.2 |
| Crab-eating<br>macaqueR3 | Crab-eating<br>macaqueR8 | 0.126 | 0.036 | 0.288 | 71.2 |
| Crab-eating<br>macaqueR4 | Crab-eating<br>macaqueR5 | 0.126 | 0.036 | 0.288 | 71.2 |
| Crab-eating<br>macaqueR4 | Crab-eating<br>macaqueR7 | 0.126 | 0.036 | 0.288 | 71.2 |
| Crab-eating<br>macaqueR4 | Crab-eating<br>macaqueR9 | 0.126 | 0.036 | 0.288 | 71.2 |

|                          |                          |       |       |       |      |
|--------------------------|--------------------------|-------|-------|-------|------|
| Crab-eating<br>macaqueR5 | Crab-eating<br>macaqueR6 | 0.126 | 0.036 | 0.288 | 71.2 |
| Crab-eating<br>macaqueR5 | Crab-eating<br>macaqueR8 | 0.126 | 0.036 | 0.288 | 71.2 |
| Crab-eating<br>macaqueR6 | Crab-eating<br>macaqueR7 | 0.126 | 0.036 | 0.288 | 71.2 |
| Crab-eating<br>macaqueR6 | Crab-eating<br>macaqueR9 | 0.126 | 0.036 | 0.288 | 71.2 |
| Crab-eating<br>macaqueR7 | Crab-eating<br>macaqueR8 | 0.126 | 0.036 | 0.288 | 71.2 |
| Crab-eating<br>macaqueR8 | Crab-eating<br>macaqueR9 | 0.126 | 0.036 | 0.288 | 71.2 |
| Crab-eating<br>macaqueR1 | Crab-eating<br>macaqueR2 | 0.126 | 0.036 | 0.288 | 71.2 |
| Crab-eating<br>macaqueR1 | Crab-eating<br>macaqueR1 | 0.035 | 0.008 | 0.234 | 76.6 |
| Crab-eating<br>macaqueR1 | Crab-eating<br>macaqueR3 | 0.035 | 0.008 | 0.234 | 76.6 |
| Crab-eating<br>macaqueR1 | Crab-eating<br>macaqueR5 | 0.035 | 0.008 | 0.234 | 76.6 |
| Crab-eating<br>macaqueR1 | Crab-eating<br>macaqueR7 | 0.035 | 0.008 | 0.234 | 76.6 |
| Crab-eating<br>macaqueR1 | Crab-eating<br>macaqueR9 | 0.035 | 0.008 | 0.234 | 76.6 |
| Crab-eating<br>macaqueR1 | Crab-eating<br>macaqueR2 | 0.168 | 0.039 | 0.233 | 76.7 |
| Crab-eating<br>macaqueR2 | Crab-eating<br>macaqueR3 | 0.168 | 0.039 | 0.233 | 76.7 |
| Crab-eating<br>macaqueR2 | Crab-eating<br>macaqueR5 | 0.168 | 0.039 | 0.233 | 76.7 |
| Crab-eating<br>macaqueR2 | Crab-eating<br>macaqueR7 | 0.168 | 0.039 | 0.233 | 76.7 |
| Crab-eating<br>macaqueR2 | Crab-eating<br>macaqueR9 | 0.168 | 0.039 | 0.233 | 76.7 |
| Crab-eating<br>macaqueR1 | Crab-eating<br>macaqueR2 | 0.045 | 0.003 | 0.060 | 94   |

|                          |                          |       |       |       |    |
|--------------------------|--------------------------|-------|-------|-------|----|
| Crab-eating<br>macaqueR2 | Crab-eating<br>macaqueR4 | 0.045 | 0.003 | 0.060 | 94 |
| Crab-eating<br>macaqueR2 | Crab-eating<br>macaqueR6 | 0.045 | 0.003 | 0.060 | 94 |
| Crab-eating<br>macaqueR2 | Crab-eating<br>macaqueR8 | 0.045 | 0.003 | 0.060 | 94 |
| Crab-eating<br>macaqueR1 | Crab-eating<br>macaqueR4 | 0     | 0     |       |    |
| Crab-eating<br>macaqueR1 | Crab-eating<br>macaqueR6 | 0     | 0     |       |    |
| Crab-eating<br>macaqueR1 | Crab-eating<br>macaqueR8 | 0     | 0     |       |    |
| Crab-eating<br>macaqueR1 | Crab-eating<br>macaqueR3 | 0     | 0     |       |    |
| Crab-eating<br>macaqueR1 | Crab-eating<br>macaqueR5 | 0     | 0     |       |    |
| Crab-eating<br>macaqueR1 | Crab-eating<br>macaqueR7 | 0     | 0     |       |    |
| Crab-eating<br>macaqueR1 | Crab-eating<br>macaqueR9 | 0     | 0     |       |    |
| Crab-eating<br>macaqueR3 | Crab-eating<br>macaqueR5 | 0     | 0     |       |    |
| Crab-eating<br>macaqueR3 | Crab-eating<br>macaqueR7 | 0     | 0     |       |    |
| Crab-eating<br>macaqueR3 | Crab-eating<br>macaqueR9 | 0     | 0     |       |    |
| Crab-eating<br>macaqueR4 | Crab-eating<br>macaqueR6 | 0     | 0     |       |    |
| Crab-eating<br>macaqueR4 | Crab-eating<br>macaqueR8 | 0     | 0     |       |    |
| Crab-eating<br>macaqueR5 | Crab-eating<br>macaqueR7 | 0     | 0     |       |    |
| Crab-eating<br>macaqueR5 | Crab-eating<br>macaqueR9 | 0     | 0     |       |    |
| Crab-eating<br>macaqueR6 | Crab-eating<br>macaqueR8 | 0     | 0     |       |    |

|                          |                          |   |   |
|--------------------------|--------------------------|---|---|
| Crab-eating<br>macaqueR7 | Crab-eating<br>macaqueR9 | 0 | 0 |
|--------------------------|--------------------------|---|---|

---

1

2 <sup>a</sup>*K<sub>s</sub>* refers to the number of synonymous nucleotide substitutions per total number of  
3 synonymous sites for each codon.

4 <sup>b</sup>*K<sub>a</sub>* refers to the number of nonsynonymous nucleotide substitutions per total number of  
5 nonsynonymous sites for each codon.

6 <sup>c</sup>*K<sub>a</sub>/K<sub>s</sub>* > 1 (bold) suggests positive selection.

7 <sup>d</sup>Purifying selection is measured by  $(1 - K_a/K_s) \times 100$ .

8

9

10

11

12

13

14

15

16

17

18

19

20

21

22

23

24

25

26

27

28

29

30

31

32

33

34



1 **Table S5.** Recombination and gene conversion events in the filaggrin gene in primates, as  
 2 detected by GeneConv.

| Recombination event number | Breakpoint positions |     | Detection methods      |                         |      |           |           |          |           |          |      |
|----------------------------|----------------------|-----|------------------------|-------------------------|------|-----------|-----------|----------|-----------|----------|------|
|                            | Begin                | End | Recombinant sequence   | Major parental sequence | RD P | GENEC ONV | Boots can | Max chi  | Chim aera | SiSs can |      |
| <b>Crab-eating macaque</b> |                      |     |                        |                         |      |           |           |          |           |          |      |
| 1                          | 656                  | 735 | Crab-eating macaque-R1 | Crab-eating macaque-R12 | NS   | 7.75E-03  | NS        | 2.63     | 7.46E-04  | NS       |      |
| 2                          | 1                    | 266 | Crab-eating macaque-R2 | Crab-eating macaque-R11 | NS   | 6.05E-03  | 4.08E-03  | NS       | NS        | NS       |      |
| <b>Orangutan</b>           |                      |     |                        |                         |      |           |           |          |           |          |      |
| 1                          | 651                  | 972 | Orangutan-R7           | Orangutan-R4            | E-05 | 8.95      | 2.36E-04  | 1.27E-04 | 1.32      | 3.66E-04 | 1.04 |
| <b>Gorilla</b>             |                      |     |                        |                         |      |           |           |          |           |          |      |
| 1                          | 575                  | 978 | Gorilla-R8             | Gorilla-R10             | NS   | NS        | NS        | 1.69     | 1.25E-04  | 1.72     |      |
| 2                          | 245                  | 594 | Gorilla-R9             | Gorilla-R4              | NS   | NS        | 6.75E-08  | 3.85     | E-04      | NS       | 4.92 |
| <b>Chimpanzee</b>          |                      |     |                        |                         |      |           |           |          |           |          |      |
| 1                          | 172                  | 975 | Chimpanzee-R6          | Chimpanzee-R3           | NS   | NS        | 4.16E-03  | 1.70     | 2.93E-03  | NS       |      |
| <b>Human</b>               |                      |     |                        |                         |      |           |           |          |           |          |      |
| 1                          | 534                  | 975 | Human-R8               | Human-R9                | NS   | 5.85E-09  | 5.25E-11  | 3.59     | 4.89E-09  | 8.55     |      |
| 2                          | 504                  | 975 | Human-R10              | Human-R3                | NS   | 2.66E-03  | 5.50E-08  | 3.39     | 2.62E-06  | 9.72     |      |

3  
4  
5  
6  
7

1 **Table S6.** Comparison between filaggrin repeat units and filaggrin-like repeat units from  
 2 macaque.

| <b>Species</b>                              | <b>No. of repeats</b> | <b>Total no.<br/>variation sites</b> | <b>Average (1 –<br/>Ka/Ks) x 100<sup>a</sup></b> | <b>Nucleotide<br/>variation</b> |
|---------------------------------------------|-----------------------|--------------------------------------|--------------------------------------------------|---------------------------------|
| <b>CRAB-EATING MACAQUE</b>                  |                       |                                      |                                                  |                                 |
| <b>Crab-eating<br/>macaque FLG</b>          | 12                    | 69                                   | 70.96                                            | 0.032                           |
| <b>Crab-eating<br/>macaque<br/>FLG-like</b> | 5                     | 73                                   | 71.33                                            | 0.039                           |

<sup>a</sup> (1-Ka/Ks) x 100 measures the percentage of purifying selection.

3  
 4  
 5  
 6  
 7  
 8  
 9  
 10  
 11  
 12  
 13  
 14  
 15  
 16  
 17  
 18  
 19  
 20  
 21  
 22  
 23  
 24  
 25  
 26

1 **Table S7.** The  $Ka/Ks$  ratio and  $(1 - Ka/Ks) \times 100$  for pairs of repeats of the filaggrin-like  
 2 gene within macaque.

**Crab-eating macaque FLG-like**

| Repeat 1      | Repeat 2      | Ks    | Ka    | Ka/Ks | $(1 - Ka/Ks) \times 100^d$ |
|---------------|---------------|-------|-------|-------|----------------------------|
| Macaque-like1 | Macaque-like2 | 0.031 | 0.016 | 0.53  | 47                         |
| Macaque-like1 | Macaque-like3 | 0.144 | 0.033 | 0.23  | 77                         |
| Macaque-like1 | Macaque-like4 | 0.108 | 0.024 | 0.22  | 78                         |
| Macaque-like1 | Macaque-like5 | 0.085 | 0.016 | 0.19  | 81                         |
| Macaque-like2 | Macaque-like3 | 0.17  | 0.044 | 0.26  | 74                         |
| Macaque-like2 | Macaque-like4 | 0.133 | 0.038 | 0.29  | 71                         |
| Macaque-like2 | Macaque-like5 | 0.099 | 0.030 | 0.30  | 70                         |
| Macaque-like3 | Macaque-like4 | 0.035 | 0.011 | 0.31  | 69                         |
| Macaque-like3 | Macaque-like5 | 0.076 | 0.019 | 0.25  | 75                         |
| Macaque-like4 | Macaque-like5 | 0.048 | 0.014 | 0.29  | 71                         |

3

4 <sup>a</sup> $Ks$  refers to the number of synonymous nucleotide substitutions per total number of  
 5 synonymous sites for each codon.

6 <sup>b</sup> $Ka$  refers to the number of nonsynonymous nucleotide substitutions per total number of  
 7 nonsynonymous sites for each codon.

8 <sup>c</sup> $Ka/Ks > 1$  (bold) suggests positive selection.

9 <sup>d</sup>Purifying selection is measured by  $(1 - Ka/Ks) \times 100$ .

10

11

12

13

14

15

16

17

18

19

20

21

22

23

24

25

1 **Table S8.** Positively selected codons of the filaggrin-like in macaque.

**Crab-eating macaque FLG-like**

**Sites-based test**

| <b>Models compared</b>   | <b><i>P</i> value</b> | <b>Positively selected codons</b> |
|--------------------------|-----------------------|-----------------------------------|
| M1a vs. M2a <sup>a</sup> | 0.99                  | No sites                          |
| M7 vs M8 <sup>a</sup>    | 0.99                  | No sites                          |

2

3 <sup>a</sup>The site-based test compared the M1a(nearly neutral) and M2a (positive selection) models  
4 and the M7 (Beta) and M8 (Beta and  $\omega$ )models.

5

6

7

8

9

10

11

12

13

14

15

16

17

18

19

20

21

22

23

24

25

26

27

28

29

30

31

32

1 **Figure S1.** Diagram of filaggrin gene structure and repeated region. Human filaggrin gene  
 2 includes 3 exons and 2 introns, with the repeat region being found on the third. The rest of the  
 3 human filaggrin gene comprises exon 1 with 54bp, intron 1 with 9613bp, exon 2 with 159bp,  
 4 an intron 2 with 570bp and, in exon 3 a Domain A, which contains two calcium-binding  
 5 domain, and Domain B, which facilitates the translocation in terminally differentiating  
 6 keratinocytes, with 879bp, for a total of 11275bp which we further refer this region as the  
 7 “non-repeated region”. Neither exons other than exon 3 nor introns have filaggrin repeated  
 8 units. The filaggrin repeat region consists of complete repeats that are flanked by two partial  
 9 repeats. Black = partial repeats and white = complete repeats. UTR = Untranslated region.

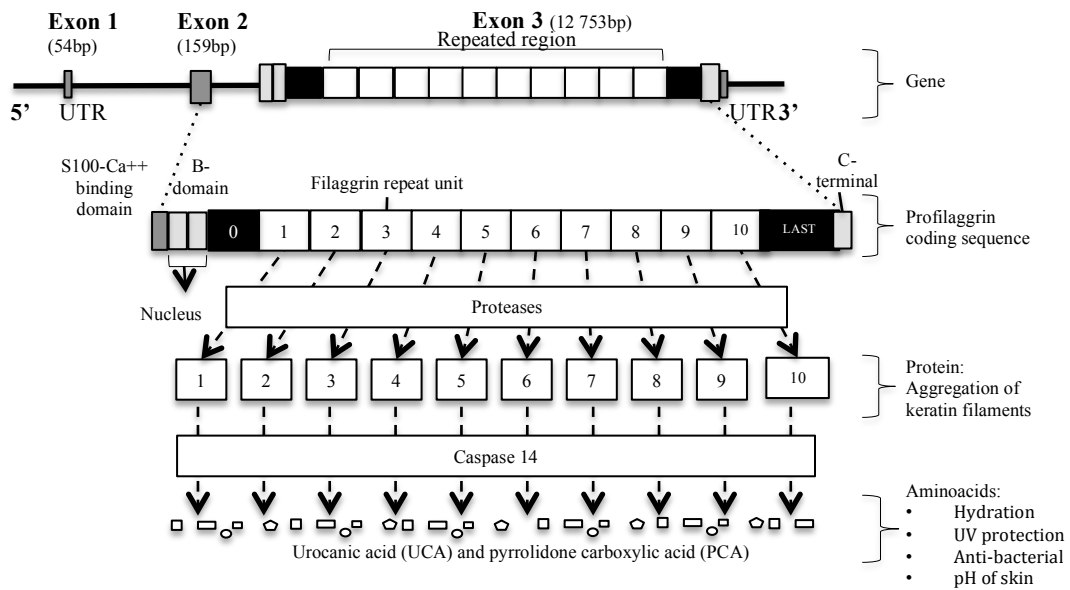

10  
 11  
 12  
 13  
 14  
 15  
 16  
 17  
 18  
 19  
 20  
 21  
 22  
 23  
 24  
 25

1 **Figure S2.** Dot-plot matrices between the human repeat region (*x*-axis) and primate exon 3  
2 (*y*-axis) sequences of the filaggrin gene downloaded from the National Center for  
3 Biotechnology Information database. (A) Dot-plot matrix between the human repeat region  
4 and orangutan exon 3 sequences, compared using the nucleotide method with a 5-unit size  
5 filter option; misalignment regions were found between 5,200 and 9,100 bp, as shown in  
6 Figure 1. (B) Dot-plot matrix between the human repeat region and gorilla exon 3 sequences,  
7 using the nucleotide method with a 5-unit size filter option; misalignment regions (shown as  
8 red lines) were found at the end of the gorilla sequence after 9,000 bp, as shown in Figure 1.  
9 (C) Dot-plot matrix between the chimpanzee FLG-like sequence and chimpanzee-repeat 1,  
10 using the nucleotide method with a 5-unit size filter option; filaggrin repeat units are shown  
11 as yellow lines. Filaggrin-like gene in chimpanzee includes 1 complete repeat between two  
12 incomplete repeats. (D) Dot-plot matrix between the crab-eating macaque FLG-like sequence  
13 located in chromosome 1 and macaque-repeat 1, using the nucleotide method with a 5-unit  
14 size filter option; filaggrin repeat units are shown as purple lines. Filaggrin-like gene in  
15 macaque located in chromosome 1 includes 5 complete filaggrin repeats. (E) Dot-plot matrix  
16 between the crab-eating macaque FLG-like sequence located in chromosome 3 and macaque-  
17 repeat 1, using the nucleotide method with a 5-unit size filter option; none filaggrin repeat  
18 units were found.

19

20

21 **A.**

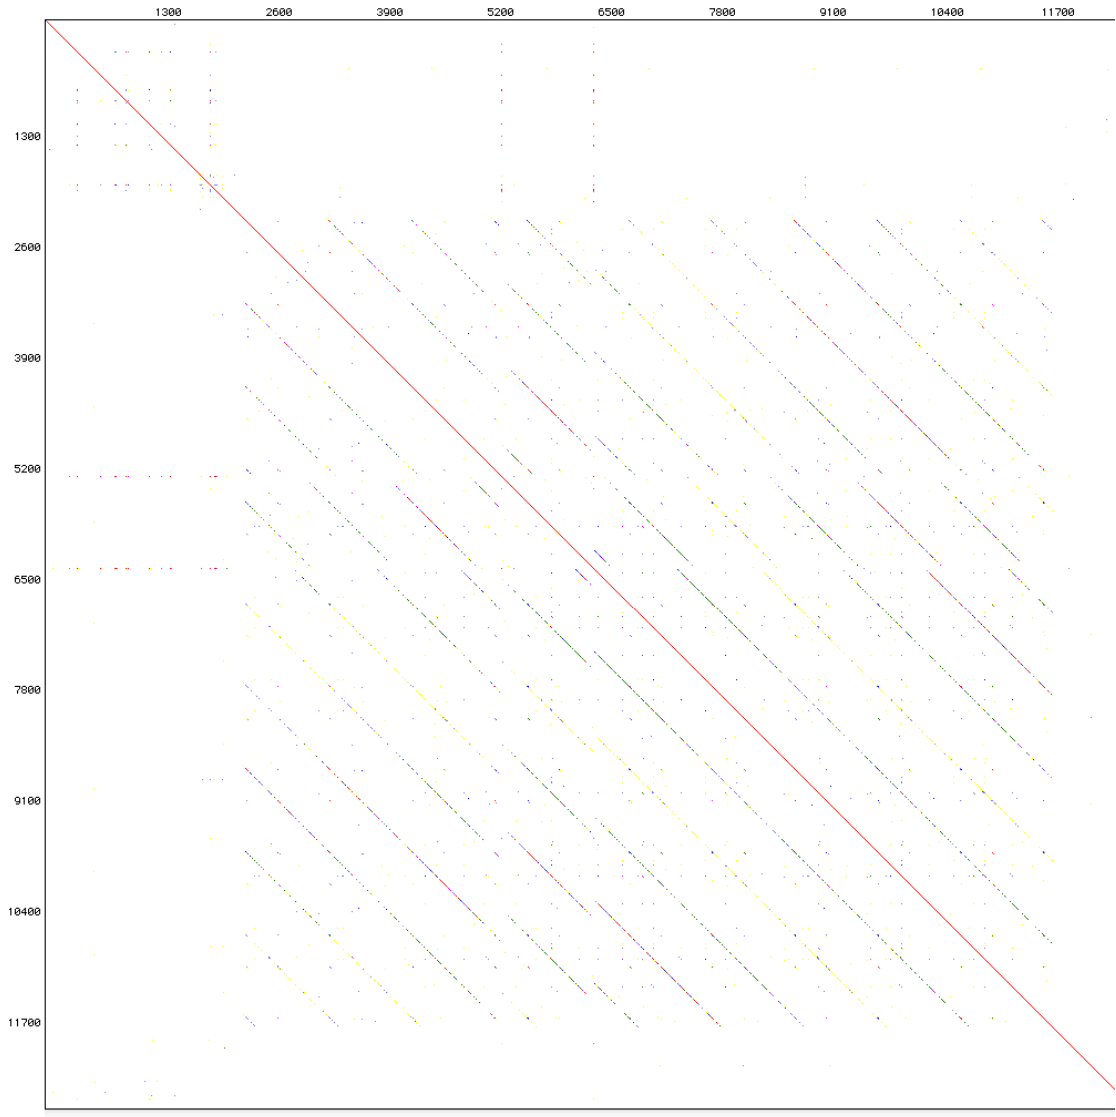

1st ( Horizontal ) : Human-repeatedregion.fasta ( 1 - 12764 )  
 2nd ( Vertical ) : Orangutan-exon3.fasta ( 1 - 12764 )

- 1
- 2
- 3
- 4
- 5
- 6
- 7
- 8
- 9
- 10
- 11
- 12
- 13
- 14

1 B

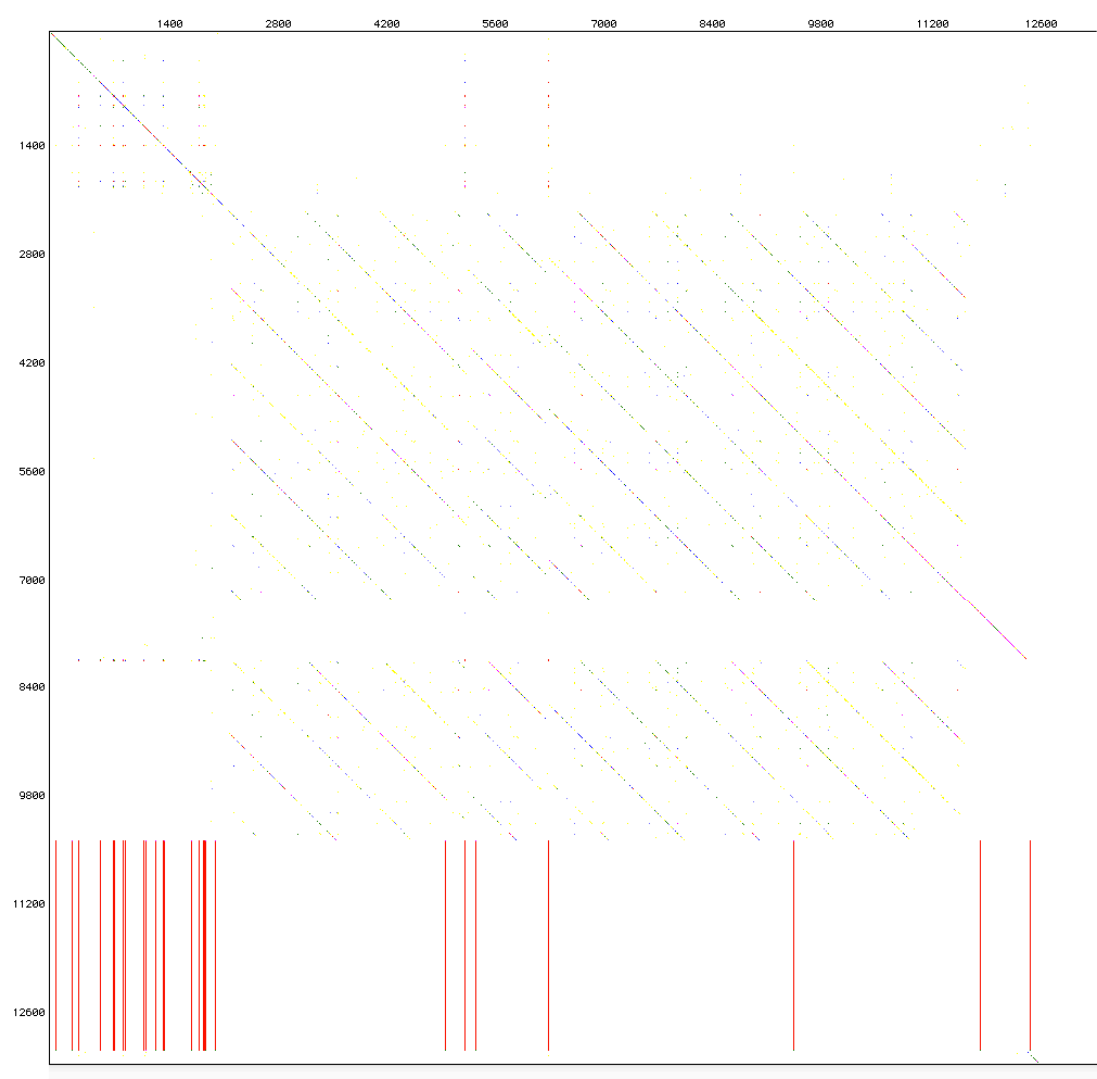

1st ( Horizontal ) : Human-repeatedregion.fasta ( 1 - 12764 )  
2nd ( Vertical ) : Gorilla-exon3.fasta ( 1 - 13326 )

- 2
- 3
- 4
- 5
- 6
- 7
- 8
- 9
- 10
- 11
- 12
- 13
- 14
- 15



1 C

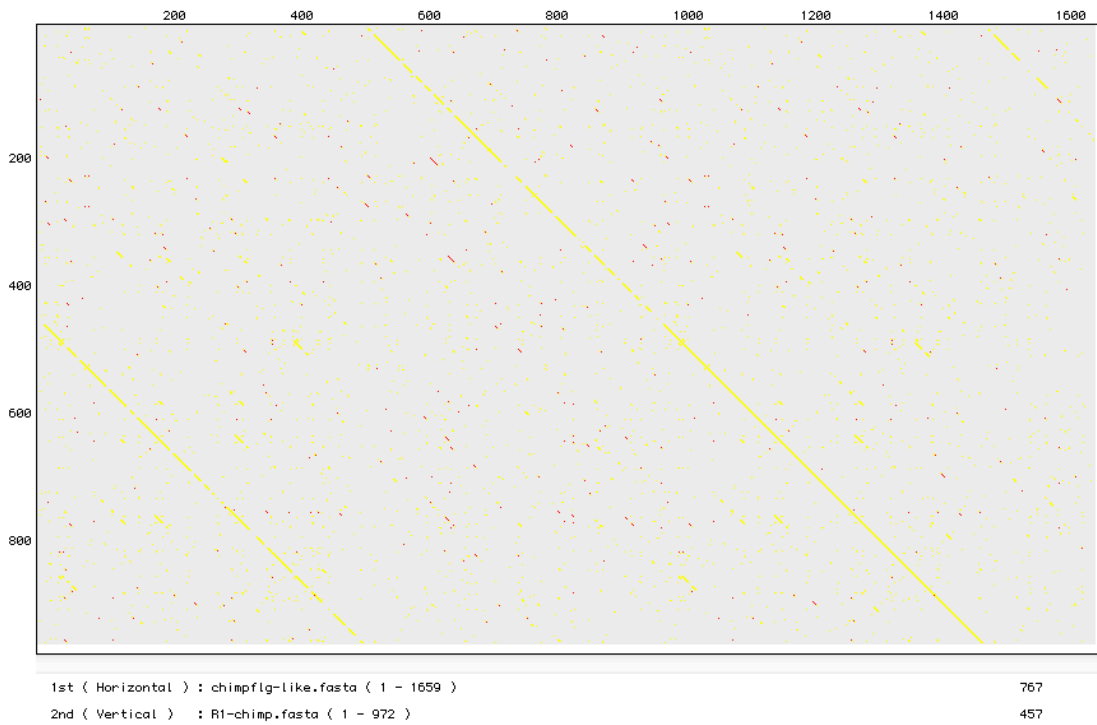

- 2
- 3
- 4
- 5
- 6
- 7
- 8
- 9
- 10
- 11
- 12
- 13
- 14
- 15
- 16
- 17
- 18
- 19
- 20
- 21
- 22
- 23

1 **D**

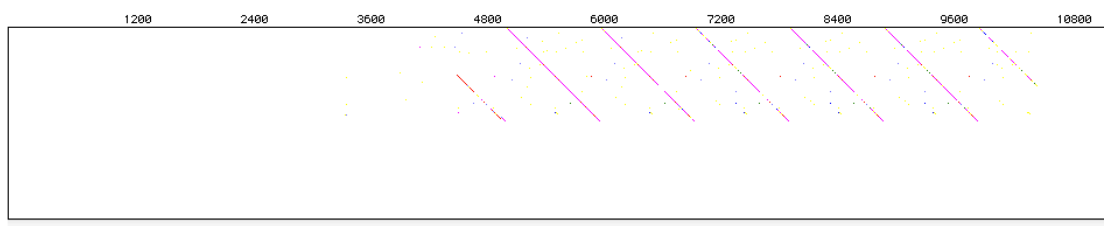

1st ( Horizontal ) : macaqueiflg-like.fasta ( 1 - 11393 ) 5809  
2nd ( Vertical ) : R1rfascicularis.fasta ( 1 - 972 ) 373

- 2
- 3
- 4
- 5
- 6
- 7
- 8
- 9
- 10
- 11
- 12
- 13
- 14
- 15
- 16
- 17
- 18
- 19
- 20
- 21
- 22
- 23
- 24
- 25
- 26
- 27
- 28
- 29
- 30
- 31
- 32

1 E

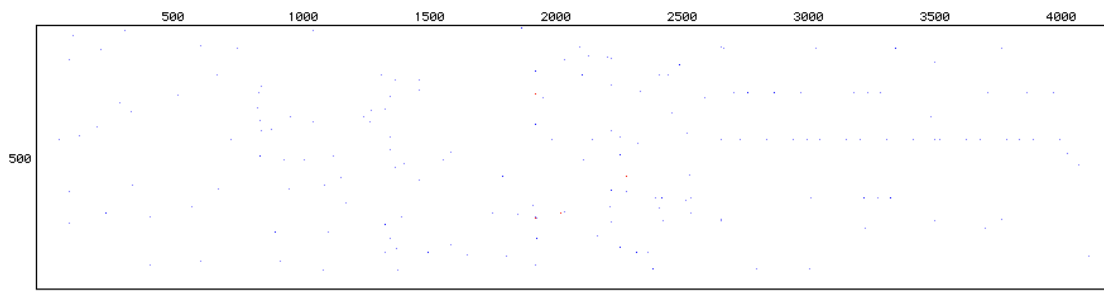

1st ( Horizontal ) : macaque3flg-like.fasta ( 1 - 4190 ) 3246  
2nd ( Vertical ) : R1\_fascicularis.fasta ( 1 - 972 ) 516

- 2
- 3
- 4
- 5
- 6
- 7
- 8
- 9
- 10
- 11
- 12
- 13
- 14
- 15
- 16
- 17
- 18
- 19
- 20
- 21
- 22
- 23
- 24
- 25
- 26
- 27
- 28
- 29
- 30

1 **Figure S3.** Phylogenetic tree reconstructions using all complete repeats of the filaggrin gene  
2 in human, chimpanzee, gorilla, orangutan, and crab-eating macaque. **(A)** Neighbor-joining-  
3 tree reconstruction using all complete repeats of *FLG* in human, chimpanzee, gorilla,  
4 orangutan, and crab-eating macaque. The following parameters were used: pairwise deletion,  
5 proportional nucleotide differences, 1,000 bootstrap resampling, and a cutoff value of 50%.  
6 Bootstrap values are shown at the beginning of each branch. **(B)** Maximum parsimony tree  
7 reconstruction using all complete repeats in these primates and the following parameters:  
8 partial deletion, and a 1,000 bootstrap resampling.

9  
10  
11  
12  
13  
14  
15  
16  
17  
18  
19  
20  
21  
22  
23  
24  
25  
26  
27  
28  
29  
30  
31  
32  
33  
34  
35  
36  
37

1 A.

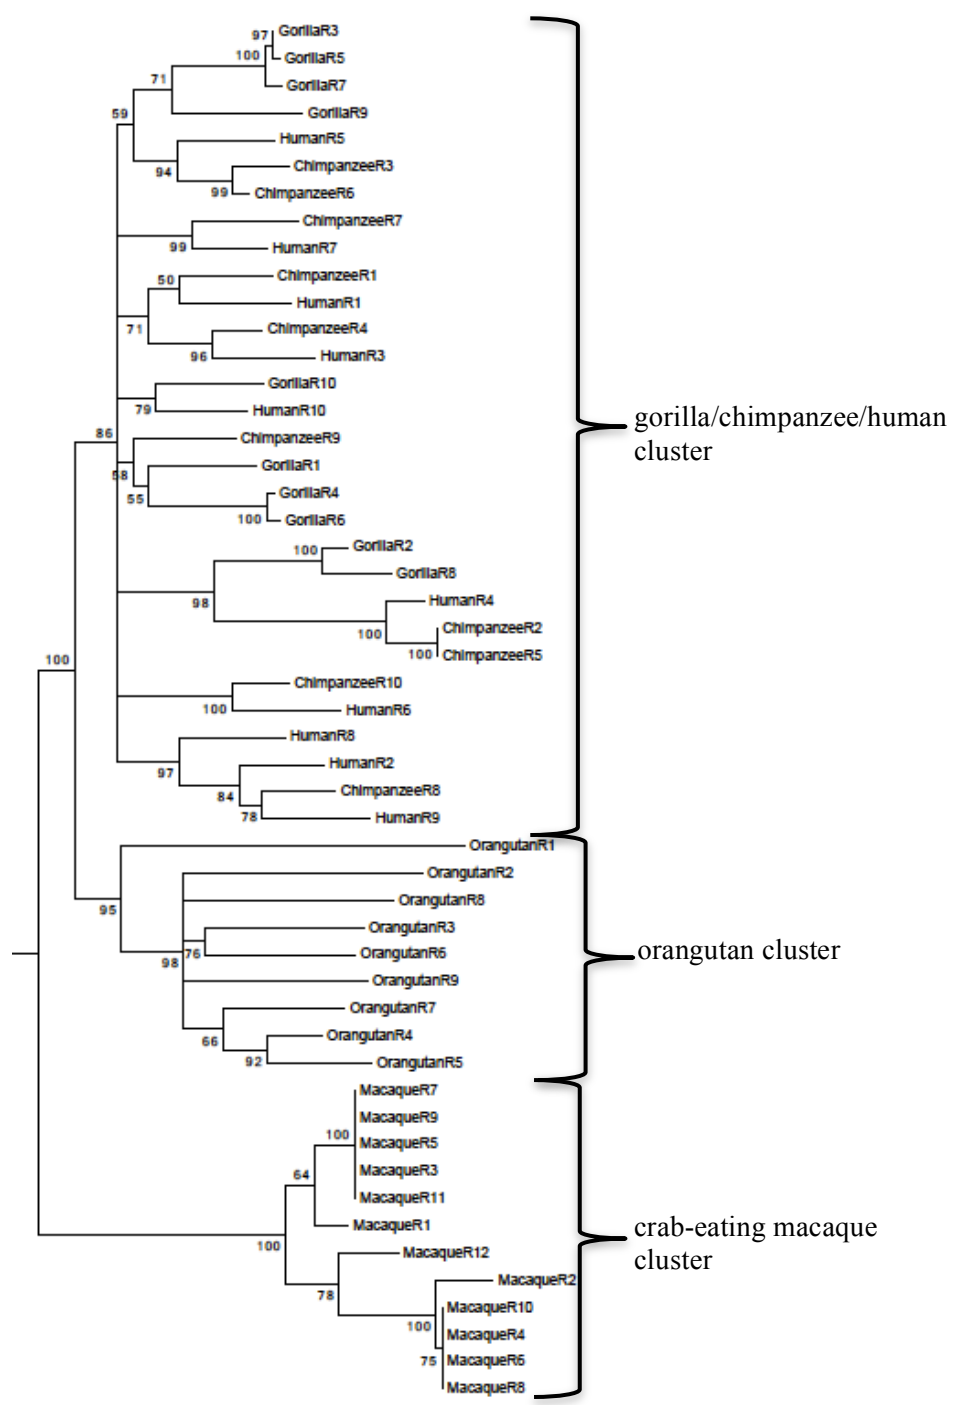

2  
3  
4  
5  
6  
7  
8  
9

1 B.

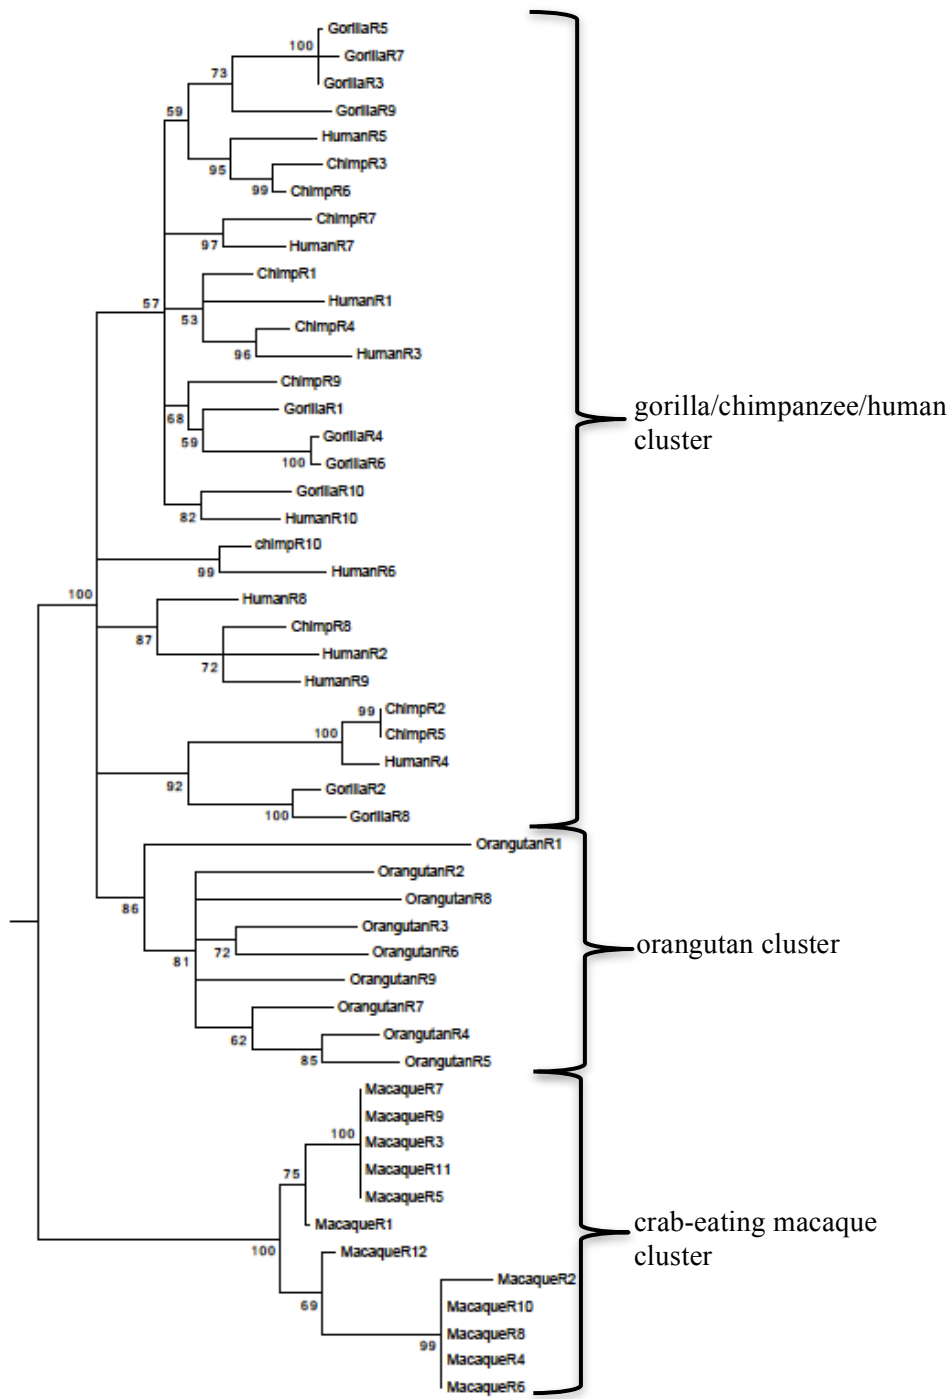

2  
3  
4  
5  
6  
7  
8  
9

1 **Figure S4.** Phylogenetic tree reconstructions using all complete repeats of the filaggrin gene  
2 in human, chimpanzee, gorilla, orangutan, crab-eating macaque, dog and mouse. (A)  
3 Maximum likelihood tree reconstruction using all complete repeats in human, chimpanzee,  
4 gorilla, orangutan, crab-eating macaque, dog, and mouse and the following parameters:  
5 partial deletion option, Tamura-Nei model with gamma distribution and invariable sites,  
6 nearest-neighbor-interchange heuristic method, 1,000 bootstrap resampling, and a cutoff  
7 value of 50%. (B) Neighbor-joining-tree reconstruction using all complete repeats of *FLG* in  
8 human, chimpanzee, gorilla, orangutan, crab-eating macaque, dog, and mouse. The following  
9 parameters were used: pairwise deletion, proportional nucleotide differences, 1,000 bootstrap  
10 resampling, and a cutoff value of 50%. Bootstrap values are shown at the beginning of each  
11 branch. (C) Maximum parsimony tree reconstruction using all complete repeats in human,  
12 chimpanzee, gorilla, orangutan, crab-eating macaque, dog, and mouse and the following  
13 parameters: partial deletion, and a 1,000 bootstrap resampling. (D) A “Reconciled” tree using  
14 the complete repeats of the filaggrin gene in human, chimpanzee, gorilla, orangutan, crab-  
15 eating macaque, dog, and mouse. This “reconciled” tree was able to detect duplication (red  
16 squares) and loss events (light gray italics) from the most common ancestor of these species.  
17 Mouse repeats duplicated 15 times, dog repeats duplicated 3 times, crab-eating macaque  
18 repeats duplicated 11 times, orangutan repeats duplicated 8 times, and  
19 gorilla/chimpanzee/human repeats duplicated 18 times. In human, the counterpart to  
20 chimpanzee-repeat 9 has been lost, while in chimpanzee; the counterparts to human-repeats  
21 10 and 8 have been lost.

22  
23  
24  
25  
26  
27  
28  
29  
30  
31  
32  
33  
34  
35  
36  
37

1 A.

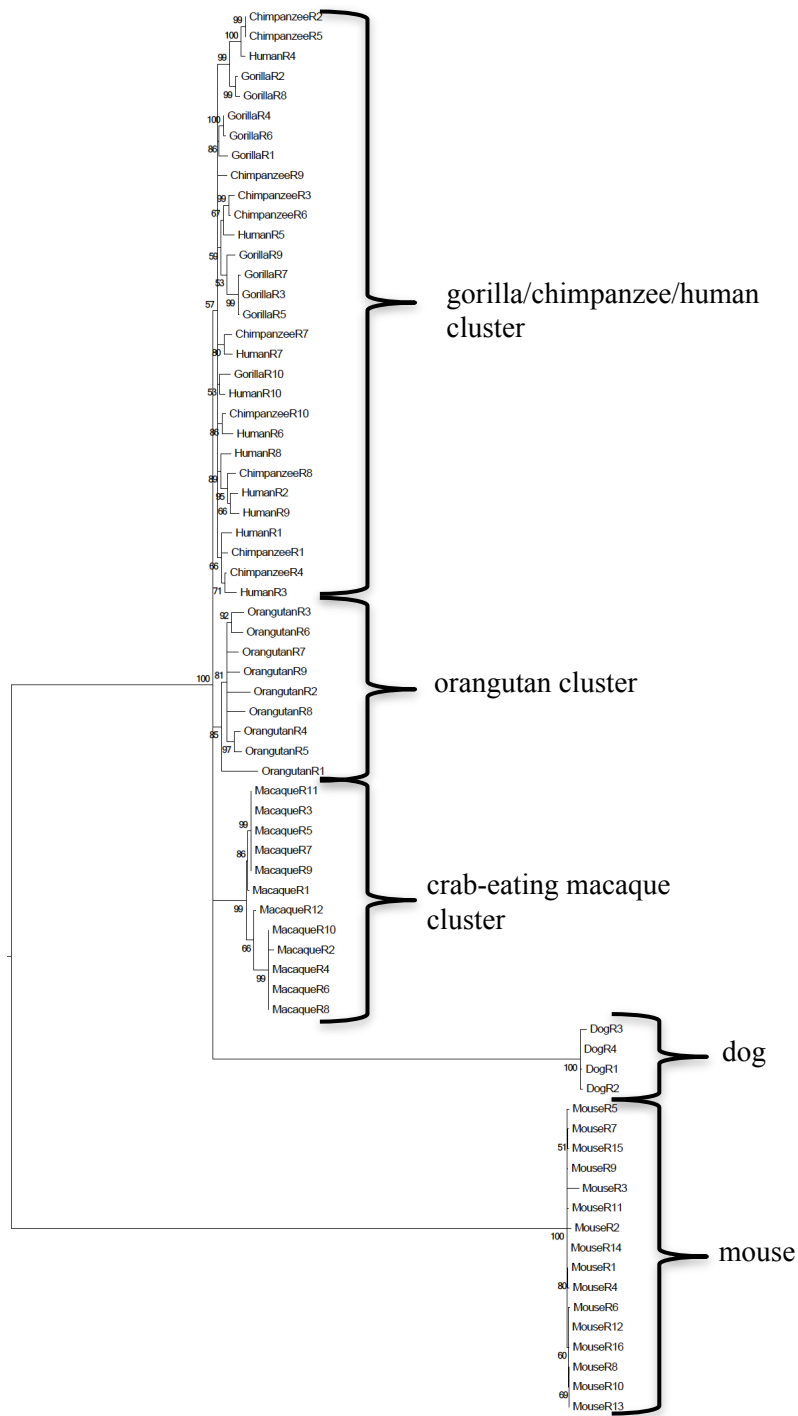

- 2
- 3
- 4
- 5
- 6
- 7
- 8
- 9



1 B.

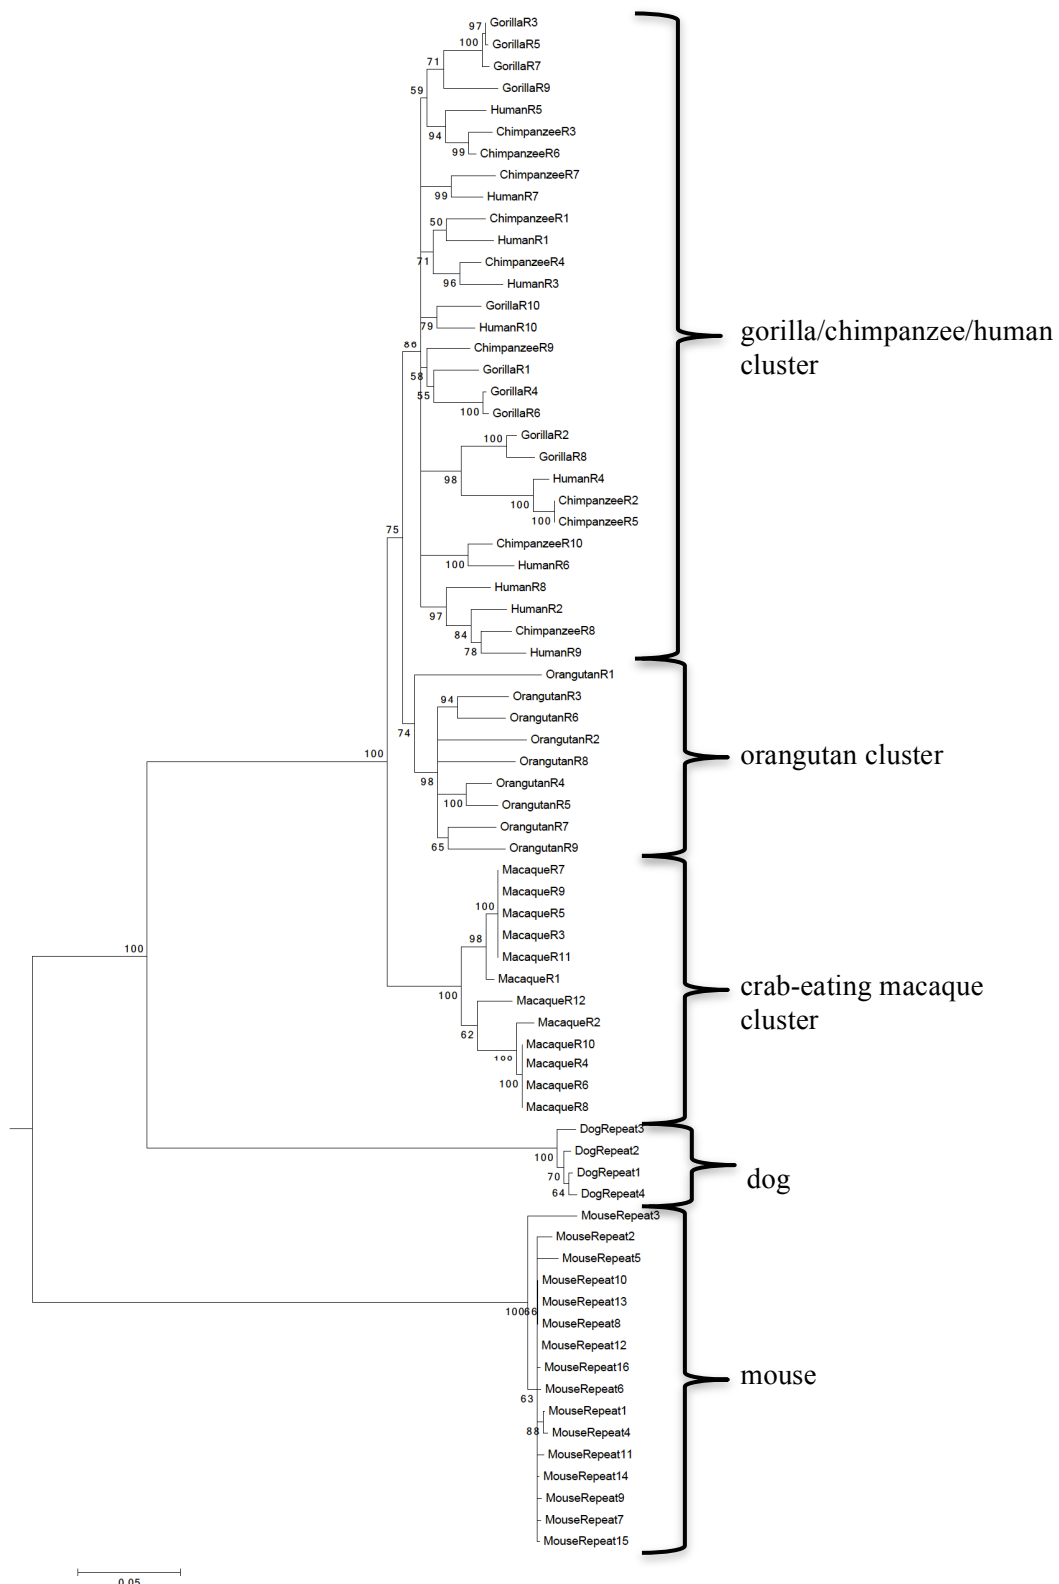

2  
3  
4  
5  
6

1 C.

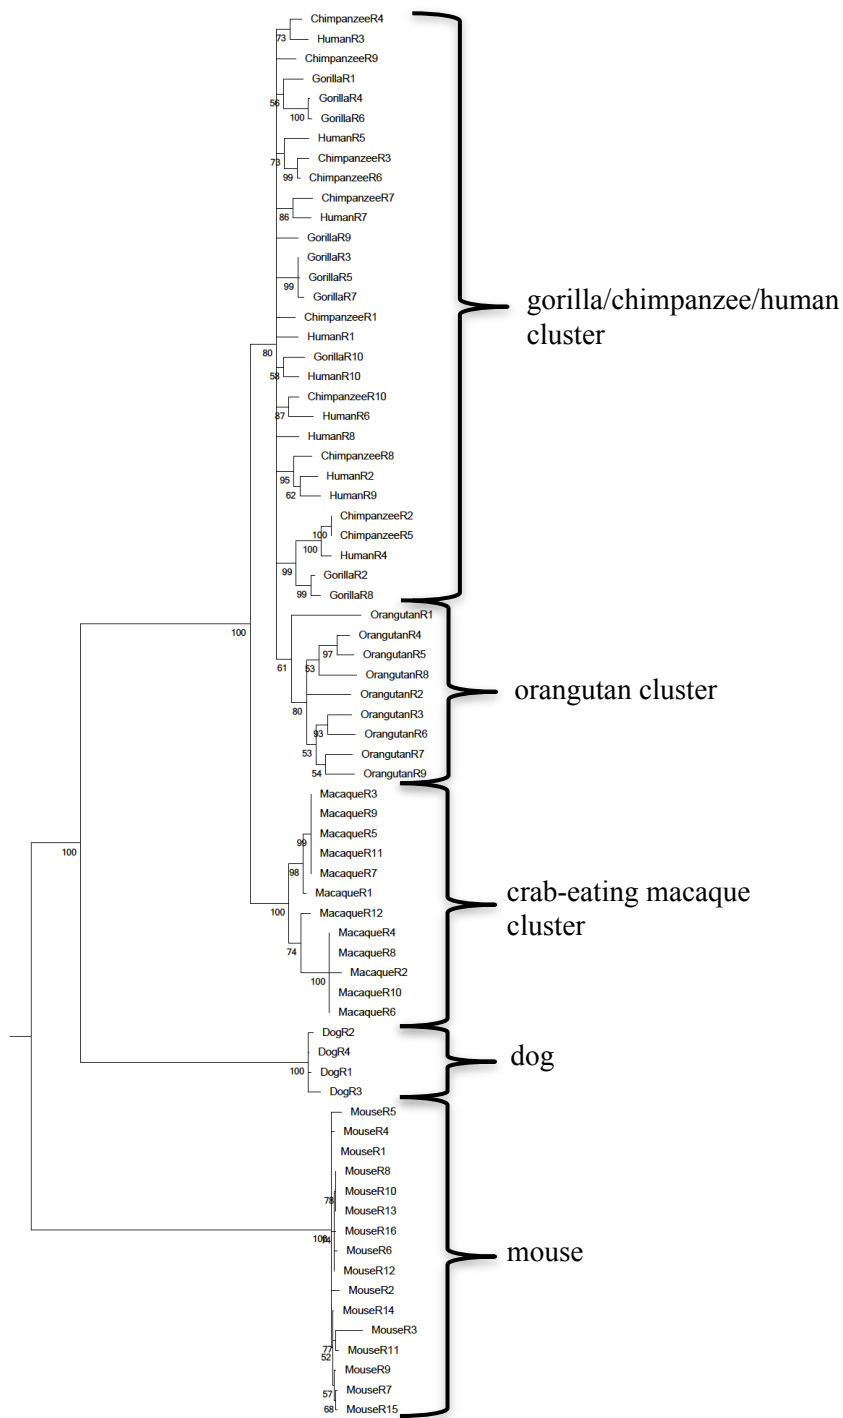

- 2
- 3
- 4
- 5
- 6
- 7
- 8

1 D.

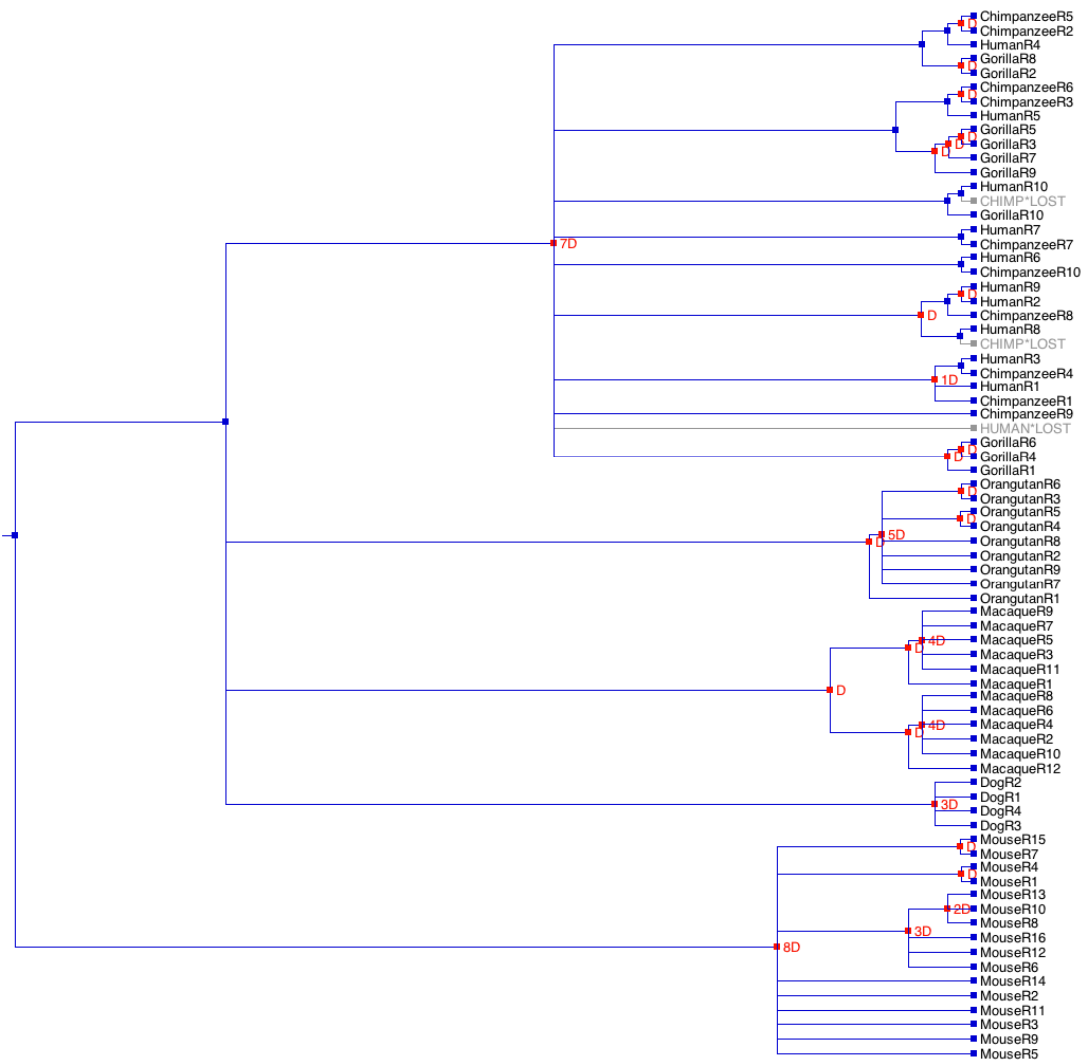

- 2
- 3
- 4
- 5
- 6
- 7
- 8
- 9
- 10
- 11
- 12
- 13
- 14
- 15
- 16

1 **Figure S5.** Neighbor-joining tree reconstruction using complete repeats of the filaggrin gene  
 2 in five primate species. Repeats that were found to have a possible recombinant region or  
 3 gene conversion were excluded. The following parameters were used: pairwise deletion,  
 4 proportional nucleotide differences, 1,000 bootstrap resampling, and a cutoff value of 50%.  
 5 Most of the topology remained the same as shown in Supplementary figure S3A.

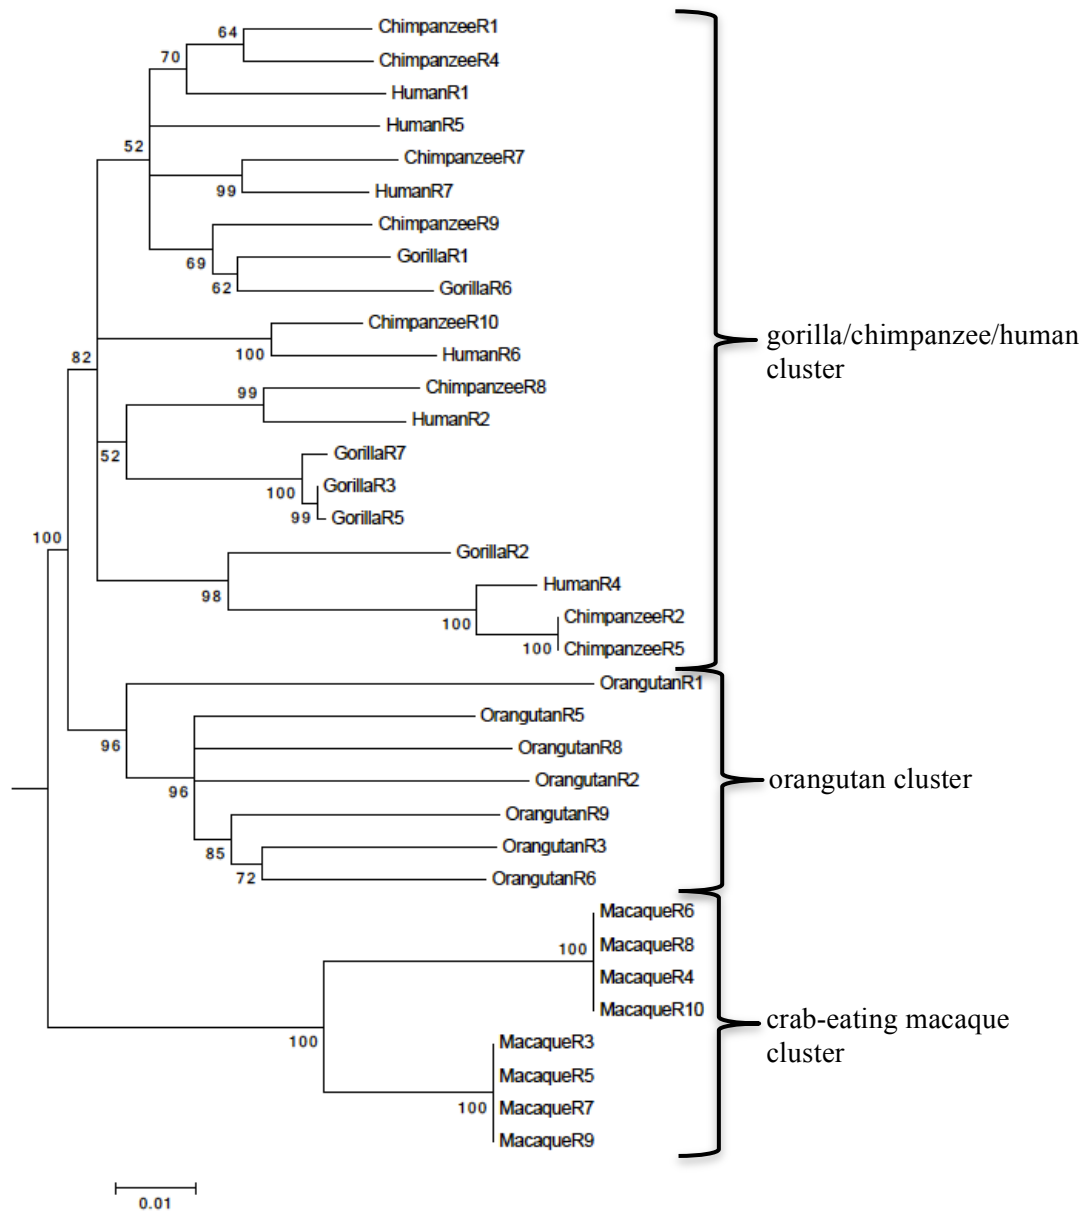

6  
 7  
 8  
 9  
 10  
 11  
 12  
 13

1 **Figure S6.** Gel electrophoresis picture of filaggrin repeated regions of all primates. Primers  
 2 used are described in Table S1. Ladder used is  $\lambda$  DNA *Hind III*. Human repeated region vary  
 3 from 12000 to 14000 bp depending on the number of repeats. Repeat variation is also seen in  
 4 chimpanzee and macaque. **Upper** Gel electrophoresis sample order: Chimpanzee GAIN ID:  
 5 0143, 0212, 0158, 0170, 0204, 0211, 0131, 0279, 0169, 0276, 0159 0345, and Primate ID:  
 6 954 and 956. **Middle** Gel electrophoresis sample order: Gorilla Primate ID: 1943 and 3846,  
 7 and GAIN ID:0080, Orangutan Primate ID: 2541 and GAIN ID: 0091, 0031, 0110 and 0010,  
 8 *Macacca fascicularis* ID:181 and 246 and *Macacca mulatta* ID: 725 and 970. **Lower** Gel  
 9 electrophoresis sample order: First four samples include PCR product for human repeated  
 10 region: homozygote for 12 repeats, heterozygote for 11 and 12 repeats, heterozygote for 10  
 11 and 11 repeats, heterozygote for 10 and 12 repeats. Final four samples shows the repeat  
 12 variation region: homozygote for 12 repeats, heterozygote for 11 and 12 repeats, heterozygote  
 13 for 10 and 11 repeats, heterozygote for 10 and 12 repeats.

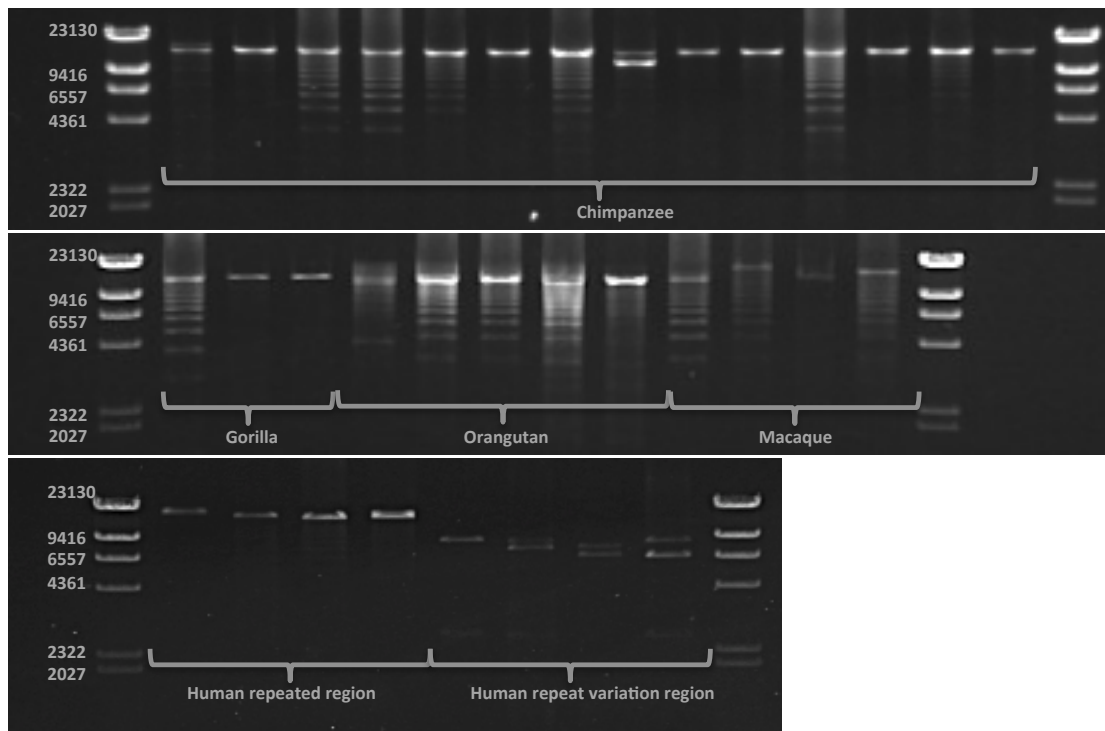

14  
 15  
 16  
 17  
 18  
 19  
 20  
 21  
 22
